# 1 ***TP53* mutations and drug sensitivity in acute myeloid**

## 2 **leukaemia cells with acquired MDM2 inhibitor resistance**

3 Martin Michaelis<sup>1</sup>, Constanze Schneider<sup>2</sup>, Florian Rothweiler<sup>2</sup>, Tamara Rothenburger<sup>2</sup>,  
4 Marco Mernberger<sup>3</sup>, Andrea Nist<sup>3</sup>, Andreas von Deimling<sup>4</sup>, Daniel Speidel<sup>5,6</sup>, Thorsten  
5 Stiewe<sup>3,7</sup>, Jindrich Cinatl jr.<sup>2\*</sup>

6

7 <sup>1</sup> Industrial Biotechnology Centre and School of Biosciences, University of Kent,  
8 Canterbury CT2 7NJ, UK

9 <sup>2</sup> Institut für Medizinische Virologie, Klinikum der Goethe-Universität, Paul Ehrlich-Str.  
10 40, 60596 Frankfurt am Main, Germany

11 <sup>3</sup> Genomics Core Facility, Philipps-University, 35037 Marburg, Germany

12 <sup>4</sup> Department of Neuropathology, Ruprecht-Karls-University Heidelberg and  
13 Deutsches Krebsforschungszentrum, Heidelberg, Germany

14 <sup>5</sup> Children's Medical Research Institute, The University of Sydney, Westmead, New  
15 South Wales 2145, Australia

16 <sup>6</sup> Current address: Evotec International GmbH, 22419 Hamburg, Germany

17 <sup>7</sup> Institute of Molecular Oncology, Philipps-University, 35037 Marburg, Germany

18 **E-mail addresses:** M. Michaelis, [M.Michaelis@kent.ac.uk](mailto:M.Michaelis@kent.ac.uk); Constanze Schneider,  
19 [constanze.schneider@googlemail.com](mailto:constanze.schneider@googlemail.com); Florian Rothweiler,  
20 [f.rothweiler@kinderkrebsstiftung-frankfurt.de](mailto:f.rothweiler@kinderkrebsstiftung-frankfurt.de); Tamara Rothenburger,  
21 [t.rothenburger@kinderkrebsstiftung-frankfurt.de](mailto:t.rothenburger@kinderkrebsstiftung-frankfurt.de); Marco Mernberger,  
22 [marco.mernberger@imt.uni-marburg.de](mailto:marco.mernberger@imt.uni-marburg.de); Andrea Nist, [andrea.nist@imt.uni-marburg.de](mailto:andrea.nist@imt.uni-marburg.de);  
23 [Andreas.vonDeimling@med.uni-heidelberg.de](mailto:Andreas.vonDeimling@med.uni-heidelberg.de);

24 Daniel Speidel, dspeidellab@gmail.com; Thorsten Stiewe, stiewe@uni-marburg.de;

25 Jindrich Cinatl jr., Cinatl@em.uni-frankfurt.de

26 **\*Corresponding author**

27 Jindrich Cinatl jr.: phone +49 69 6301 6409

28

## 29 **Abstract**

30 Background: MDM2 inhibitors are under investigation for the treatment of acute  
31 myeloid leukaemia (AML) patients in phase III clinical trials. To study resistance  
32 formation to MDM2 inhibitors in AML cells, we here established 45 sub-lines of the  
33 AML *TP53* wild-type cell lines MV4-11 (15 sub-lines), OCI-AML-2 (10 sub-lines), OCI-  
34 AML-3 (12 sub-lines), and SIG-M5 (8 sub-lines) with resistance to the MDM2 inhibitor  
35 nutlin-3.

36 Methods: Nutlin-3-resistant sub-lines were established by continuous exposure to  
37 stepwise increasing drug concentrations. The *TP53* status was determined by next  
38 generation sequencing, cell viability was measured by MTT assay, and p53 was  
39 depleted using lentiviral vectors encoding shRNA.

40 Results: All MV4-11 sub-lines harboured the same R248W mutation and all OCI-AML-  
41 2 sub-lines the same Y220C mutation, indicating the selection of pre-existing *TP53*-  
42 mutant subpopulations. In concordance, rare alleles harbouring the respective  
43 mutations could be detected in the parental MV4-11 and OCI-AML-2 cell lines. The  
44 OCI-AML-3 and SIG-M5 sub-lines were characterised by varying *TP53* mutations or  
45 wild type *TP53*, indicating the induction of *de novo TP53* mutations. Doxorubicin,  
46 etoposide, gemcitabine, cytarabine, and fludarabine resistance profiles revealed a  
47 noticeable heterogeneity among the sub-lines even of the same parental cell lines.  
48 Loss-of-p53 function was not generally associated with decreased sensitivity to  
49 cytotoxic drugs.

50 Conclusion: We introduce a substantial set of models of acquired MDM2 inhibitor  
51 resistance in AML. MDM2 inhibitors select, in dependence on the nature of a given  
52 AML cell population, pre-existing *TP53*-mutant subpopulations or induce *de novo TP53*  
53 mutations. Although loss-of-p53 function has been associated with chemoresistance

54 in AML, nutlin-3-adapted sub-lines displayed in the majority of experiments similar or  
55 increased drug sensitivity compared to the respective parental cells. Hence,  
56 chemotherapy may remain an option for AML patients after MDM2 inhibitor therapy  
57 failure. Even sub-lines of the same parental cancer cell line displayed considerable  
58 heterogeneity in their response to other anti-cancer drugs, indicating the need for the  
59 detailed understanding and monitoring of the evolutionary processes in cancer cell  
60 populations in response to therapy as part of future individualised treatment protocols.

61

62 **Key words:** acquired resistance, MDM2, TP53, acute myeloid leukaemia, nutlin-3,  
63 cross-resistance, heterogeneity

64

65

## 66 **Background**

67 MDM2 inhibitors are under development as novel class of anti-cancer drugs for  
68 the treatment *TP53* wild-type cancer cells from different cancer entities including acute  
69 myeloid leukaemia (AML) [1]. *TP53* encodes p53, a major tumour suppressor protein.  
70 *MDM2* is a p53 target gene that encodes for MDM2, a major endogenous inhibitor of  
71 p53. MDM2 physically interacts with p53 and mediates its ubiquitination and  
72 proteasomal degradation. MDM2 inhibitors activate p53 signalling by interference with  
73 the MDM2/ p53 interaction [1-3].

74 Various MDM2 inhibitors have been shown to exert anti-cancer effects in pre-  
75 clinical models of AML, alone or in combination with other drugs [4-20]. Moreover,  
76 different MDM2 inhibitors are under investigation in clinical studies for their effects on  
77 AML [18,21-23], with idasanutlin currently being tested in phase II and III trials for the  
78 treatment of AML (NCT02670044, NCT02545283).

79 Drug-adapted cancer cell lines have been used to identify and investigate  
80 clinical resistance mechanisms [24-33]. The adaptation of cancer cell lines to MDM2  
81 inhibitors indicated that the treatment of *TP53* wild-type cancer cells may be associated  
82 with the formation of *TP53* mutations as resistance mechanisms [3,34-39]. In  
83 concordance, treatment of liposarcoma patients harbouring *TP53* wild type cancer  
84 cells with the MDM2 inhibitor SAR405838 resulted in the emergence of *TP53*  
85 mutations [40].

86 The origin of MDM2 inhibitor-induced *TP53* mutations in *TP53* wild-type cell  
87 lines is not entirely clear. In dependence of the cell line model, MDM2 inhibitors may  
88 induce a range of different *de novo* *TP53* mutations in a given model or select small,  
89 pre-existing cell fractions that harbour *TP53* mutations [35,36,39,41].

90           To study acquired resistance formation to MDM2 inhibitors in AML cells, we here  
91 established and analysed a panel of sub-lines of the *TP53* wild-type AML cell lines  
92 MV4-11, OCI-AML-2, OCI-AML-3, and SIG-M5, with acquired resistance to the MDM2  
93 inhibitor nutlin-3 [3,42]. In total, this included 45 nutlin-3-adapted sub-lines (15 MV4-  
94 11 sub-lines, 10 OCI-AML-2 sub-lines, 12 OCI-AML-3 sub-lines, 8 SIG-M5 sub-lines).  
95

## 96 **Methods**

### 97 **Cells**

98 The AML cell lines MV4-11, OCI-AML-2, OCI-AML-3, and SIG-M5 were  
99 obtained from DSMZ (Braunschweig, Germany). The nutlin-3-resistant sub-lines were  
100 established by adaption to growth in the presence of increasing drug concentrations  
101 as previously described [35,36] and derived from the resistant cancer cell line (RCCL)  
102 collection [43].

103 All cells were propagated in IMDM supplemented with 10 % FBS, 100 IU/mL  
104 penicillin and 100 µg/mL streptomycin at 37°C. Cells were routinely tested for  
105 mycoplasma contamination and authenticated by short tandem repeat profiling.

106 p53-depleted SIG-M5 cells were established as described previously [44] using  
107 the Lentiviral Gene Ontology (LeGO) vector technology [45,46].

### 108 **Viability assay**

109 Cell viability was tested by the 3-(4,5-dimethylthiazol-2-yl)-2,5-  
110 diphenyltetrazolium bromide (MTT) dye reduction assay after 120 h incubation  
111 modified as described previously [35,36].  $2 \times 10^4$  cells suspended in 100 µL cell culture  
112 medium were plated per well in 96-well plates and incubated in the presence of various  
113 drug concentrations for 120 h. Then, 25µL of MTT solution (2 mg/mL (w/v) in PBS)  
114 were added per well, and the plates were incubated at 37°C for an additional 4h. After  
115 this, the cells were lysed using 100µL of a buffer containing 20% (w/v) sodium  
116 dodecylsulfate and 50% (v/v) N,N-dimethylformamide with the pH adjusted to 4.7 at  
117 37°C for 4h. Absorbance was determined at 560 nm to 620 nm for each well using a  
118 96-well multiscanner. After subtracting of the background absorption, the results are  
119 expressed as percentage viability relative to control cultures which received no drug.

120 Drug concentrations that inhibited cell viability by 50% (IC50) were determined using  
121 CalcuSyn (Biosoft, Cambridge, UK).

## 122 ***TP53* next generation sequencing**

123 The *TP53* status was determined by next generation sequencing as previously  
124 described [47]. All coding exonic and flanking intronic regions of the human *TP53* gene  
125 were amplified from genomic DNA with Platinum™ Taq DNA polymerase (Life  
126 Technologies) by multiplex PCR using two primer pools with 12 non-overlapping primer  
127 pairs each, yielding approximately 180 bp amplicons. Each sample was tagged with a  
128 unique 8-nucleotide barcode combination using twelve differently barcoded forward  
129 and eight differently barcoded reverse primer pools. Barcoded PCR products from up  
130 to 96 samples were pooled, purified and an indexed sequencing library was prepared  
131 using the NEBNext® ChIP-Seq Library Prep Master Mix Set for Illumina in combination  
132 with NEBNext® Multiplex Oligos for Illumina (New England Biolabs). The quality of  
133 sequencing libraries was verified on a Bioanalyzer DNA High Sensitivity chip (Agilent)  
134 and quantified by digital PCR. 2 x 250 bp paired-end sequencing was carried out on  
135 an Illumina MiSeq (Illumina) according to the manufacturer's recommendations at a  
136 mean coverage of 300x.

137 Read pairs were demultiplexed according to the forward and reverse primers  
138 and subsequently aligned using the Burrows-Wheeler Aligner against the Homo  
139 sapiens Ensembl reference (rev. 79). Overlapping mate pairs were combined and  
140 trimmed to the amplified region. Coverage for each amplicon was calculated via  
141 SAMtools (v1.1) [48]. To identify putative mutations, variant calling was performed  
142 using SAMtools in combination with VarScan2 (v2.3.9) [49]. Initially, SAMtools was  
143 used to create pileups with a base quality filter of 15. Duplicates, orphan reads,  
144 unmapped and secondary reads were excluded. Subsequently, Varscan2 was applied



145 to screen for SNPs and InDels separately, using a low-stringency setting with minimal  
146 variant frequency of 0.1, a minimum coverage of 20 and a minimum of 10 supporting  
147 reads per variant to account for cellular and clonal heterogeneity. Minimum average  
148 quality was set to 20 and a strand filter was applied to minimize miscalls due to poor  
149 sequencing quality or amplification bias. The resulting list of putative variants was  
150 compared against the IARC TP53 (R17) database to check for known p53 cancer  
151 mutations.

## 152 **Statistics**

153 Results are expressed as mean  $\pm$  S.D. of at least three experiments.  
154 Comparisons between two groups were performed using Student's t-test. Three and  
155 more groups were compared by ANOVA followed by the Student-Newman-Keuls test.  
156 P values lower than 0.05 were considered to be significant.

157

## 158 Results

### 159 Nutlin-3 sensitivity/ resistance status of the nutlin-3-adapted AML sub-lines

160 To study acquired resistance formation to MDM2 inhibitors in AML cells, we  
161 established and analysed a panel of sub-lines of the *TP53* wild-type AML cell lines  
162 MV4-11, OCI-AML-2, OCI-AML-3, and SIG-M5, with acquired resistance to the MDM2  
163 inhibitor nutlin-3. The parental cell lines MV4-11, OCI-AML-2, OCI-AML-3, and SIG-  
164 M5 displayed sensitivity to nutlin-3 in a range of 0.90 to 2.33 $\mu$ M (Suppl. Table 1). The  
165 nutlin-3 IC<sub>50</sub> values in the nutlin-3-adapted sub-lines of MV4-11 (nutlin-3 IC<sub>50</sub>:  
166 2.33 $\mu$ M) ranged from 13.3 to 22.6 $\mu$ M resulting in resistance factors (fold change nutlin-  
167 3 IC<sub>50</sub> in nutlin-3-adapted MV4-11 sub-lines/ nutlin-3 IC<sub>50</sub> in MV4-11) ranging  
168 between 5.7 (MV4-11<sup>r</sup>Nutlin<sup>20 $\mu$ M</sup>XII) and 9.7 (MV4-11<sup>r</sup>Nutlin<sup>20 $\mu$ M</sup>II) (Figure 1, Suppl.  
169 Table 1).

170 In the nutlin-3 adapted sub-lines of OCI-AML-2 (nutlin-3 IC<sub>50</sub>: 0.90 $\mu$ M), the  
171 nutlin-3 IC<sub>50</sub>s ranged from 14.8 $\mu$ M (OCI-AML-2<sup>r</sup>Nutlin<sup>20 $\mu$ M</sup>XI, resistance factor: 16.4)  
172 to 19.9 $\mu$ M (OCI-AML-2<sup>r</sup>Nutlin<sup>20 $\mu$ M</sup>II, resistance factor: 22.1) (Figure 2, Suppl. Table 1).  
173 In the OCI-AML-3 (nutlin-3 IC<sub>50</sub>: 1.75 $\mu$ M) sub-lines, the nutlin-3 IC<sub>50</sub>s ranged from  
174 11.3 $\mu$ M (OCI-AML-3<sup>r</sup>Nutlin<sup>20 $\mu$ M</sup>XII, resistance factor: 6.5) to 20.62 $\mu$ M (OCI-AML-  
175 3<sup>r</sup>Nutlin<sup>20 $\mu$ M</sup>XI, resistance factor 11.8) (Figure 3, Suppl. Table 1) and in the SIG-M5  
176 (Nutlin-3 IC<sub>50</sub>: 1.27 $\mu$ M) sub-lines from 3.64 $\mu$ M (SIG-M5<sup>r</sup>Nutlin<sup>20 $\mu$ M</sup>XV, resistance  
177 factor: 2.9) to 23.5 $\mu$ M (SIG-M5<sup>r</sup>Nutlin<sup>20 $\mu$ M</sup>XI, resistance factor: 18.5) (Figure 4, Suppl.  
178 Table 1).

179

## 180 ***TP53* status of nutlin-3-adapted AML cell lines and nutlin-3 resistance**

181 The determination of the *TP53* status in the nutlin-3-adapted AML sub-lines  
182 revealed that all MV4-11 sub-lines harboured the same heterozygous R248W mutation  
183 and that all OCI-AML-2 sub-lines harboured the same heterozygous Y220C mutation  
184 (Table 1). In contrast, the OCI-AML-3 and SIG-M5 sub-lines harboured a range of  
185 different *TP53* mutations and included sub-lines that had retained wild-type *TP53*.  
186 (Table 1). In concordance, 219 out of 12418 reads of the appropriate *TP53* region in  
187 the parental MV4-11 cell line indicated the presence of alleles with an R248W mutation  
188 and 98 out of 907 reads indicated the presence of alleles with a Y220C mutation in the  
189 parental OCI-AML-2 cell line. In contrast, the mutations detected in the nutlin-3-  
190 adapted OCI-AML-3- and SIG-M5-sub-lines could not be detected in the respective  
191 parental cell lines. Also, MV4-11 and OCI-AML-2 could be adapted to nutlin-3 in 12-15  
192 passages, whereas the nutlin-3 adaptation of OCI-AML-3 and SIG-M5 required 30-35  
193 passages. This indicates that MV4-11 and OCI-AML-2 contain pre-existing *TP53*-  
194 mutant subpopulation that are selected by nutlin-3 treatment, while nutlin-3 treatment  
195 resulted in *de novo* *TP53* mutations in OCI-AML-3 and SIG-M5. These results are  
196 consistent with those obtained from other cancer entities [35,36,39,41].

197 Most of the *TP53* mutations are in the DNA binding domain (aa 102-292). The  
198 R248W mutation in the nutlin-3-adapted MV4-11 sub-lines and the Y220C mutation in  
199 the nutlin-3-adapted OCI-AML-2 sub-lines belong to the ten most commonly mutated  
200 *TP53* positions. 12 of the further 13 mutations are also located in the DNA binding  
201 domain and are known or expected to affect p53 function. Codon 27 is located in the  
202 transactivation domain, which is relevant for the MDM2-p53 interaction. The P27S  
203 mutation is known to increase the binding affinity of p53 to MDM2 [50-53].

204           There was no obvious relationship between the nutlin-3 IC<sub>50</sub> in the parental cell  
205 lines in which nutlin-3 selected pre-existing *TP53*-mutant subpopulations (MV4-11:  
206 2.33μM, OCI-AML-2: 0.90μM) and those parental cell lines in which nutlin-3 induced  
207 *de novo TP53*-mutations (OCI-AML-3: 1.75μM, SIG-M5: 1.27μM). The nutlin-3-  
208 adapted sub-lines displayed similar nutlin-3 IC<sub>50</sub>s independently of the mechanism of  
209 resistance formation or nutlin-3 sensitivity of the respective parental cell line (Figure  
210 5). The fold changes (nutlin-3 IC<sub>50</sub> resistant sub-line/ nutlin-3 IC<sub>50</sub> respective parental  
211 cell line) were typically higher in parental cell lines that displayed lower nutlin-3 IC<sub>50</sub>  
212 values (Figure 5). In the OCI-AML-3- and SIG-M5- sub-lines, there was no significant  
213 difference between the nutlin-3 IC<sub>50</sub>s in the *TP53*-mutant and *TP53* wild-type cell lines  
214 (Figure 5).

#### 215 **Cross-resistance profiles in the nutlin-3-adapted AML sub-lines**

216           Next, we determined sensitivity profiles of the nutlin-3-adapted AML sub-lines  
217 to doxorubicin, etoposide, gemcitabine, cytarabine, and fludarabine (Figure 1-4, Suppl.  
218 Table 1). According to the relative sensitivity of the nutlin-3-adapted sub-lines relative  
219 to the respective parental cell lines, sub-lines were categorised as more sensitive (IC<sub>50</sub>  
220 nutlin-3-adapted sub-line/ IC<sub>50</sub> respective parental cell line <0.5), less sensitive (IC<sub>50</sub>  
221 nutlin-3-adapted sub-line/ IC<sub>50</sub> respective parental cell line >2), or similarly sensitive  
222 (IC<sub>50</sub> nutlin-3-adapted sub-line/ IC<sub>50</sub> respective parental cell line >0.5 and <2) (Figure  
223 6).

224           The sensitivity profiles indicated drug- and cell line-specific differences. Nutlin-  
225 3-resistance was not generally associated with increased resistance to other drugs  
226 (Figure 6). There was a noticeable heterogeneity in the drug response within the nutlin-  
227 3-resistant sub-lines of each parental cell line (Figure 1-4, 7). This included the MV4-  
228 11 and OCI-AML-2 sub-lines, although nutlin-3 had selected pre-existing *TP53*-mutant

229 subpopulations in them. The maximum fold difference between nutlin-3-adapted sub-  
230 lines of the same parental cell line was 11.4 with MV4-11rNutlin<sup>20μM</sup>XII having a  
231 doxorubicin IC50 of 2.28ng/mL and MV4-11rNutlin<sup>20μM</sup>VII having a doxorubicin IC50 of  
232 26.0ng/mL (Figure 7).

233 Finally, the drug response patterns were more similar between doxorubicin and  
234 etoposide than between these two drugs and the other agents (Figure 1-4, 6).

235

## 236 Discussion

237 MDM2 inhibitors are currently being investigated in phase II and III clinical trials  
238 for AML (NCT02670044, NCT02545283). In various cell types, resistance formation to  
239 MDM2 inhibitors has previously been shown to be associated with the selection of pre-  
240 existing *TP53*-mutant cancer cell populations or the induction of *de novo TP53*  
241 mutations [3,35,36,39,41]. A clinical trial in liposarcoma patients confirmed that MDM2  
242 inhibitor therapy is also associated with the emergence of *TP53* mutations in the clinic  
243 [40]. Here, we present a new set of models of acquired MDM2 inhibitor resistance in  
244 AML, in total 45 nutlin-3-adapted sub-lines of the AML cell lines MV4-11 (15 sub-lines),  
245 OCI-AML-2 (10 sub-lines), OCI-AML-3 (12 sub-lines), and SIG-M5 (8 sub-lines). Our  
246 results indicate that both mechanisms, selection of pre-existing *TP53*-mutant cancer  
247 cells and induction of *de novo TP53* mutations, are relevant in AML. Nutlin-3  
248 consistently selected pre-existing *TP53*-mutant subpopulations in MV4-11 (R248W)  
249 and OCI-AML-2 (Y220C) cells. Interestingly, two other studies had also reported the  
250 emergence of R248W mutations in MV4-11 sub-lines. One study reported on an MDM2  
251 inhibitor (SAR405838)-adapted MV4-11 sub-line with an R248W mutation [38].  
252 Another one presented an R248W-mutant MV4-11 sub-line that had emerged during  
253 prolonged cell line cultivation [9]. This suggests the consistent presence of an MV4-11  
254 subpopulation that harbours an R248W *TP53* mutation.

255 In contrast, the 12 nutlin-3-adapted OCI-AML-3 sub-lines included 9 *TP53*-  
256 mutant sub-lines, which all harboured different mutations, and 3 sub-lines that had  
257 retained wild-type *TP53*. Similarly, the 8 SIG-M5 sub-lines consisted of 4 *TP53*-mutant  
258 sub-lines, again each harbouring a different mutation, and 4 *TP53* wild-type sub-lines.

259 Notably, loss-of-p53-function has been associated with aggressive disease,  
260 chemoresistance, and dismal outcome in AML [54]. In patients with therapy-related

261 AML, cytotoxic chemotherapy selected pre-existing *TP53*-mutant clones that were  
262 highly resistant to therapy [55,56]. However, resistance formation to nutlin-3 was not  
263 generally associated with cross-resistance to other anti-cancer drugs in AML cells.  
264 Hence, loss-of-p53-function does not always seem to mediate resistance to cytotoxic  
265 therapies directly. Indeed, RNAi-mediated depletion of p53 in SIG-M5 cells resulted in  
266 increased resistance to nutlin-3 but not to doxorubicin (Suppl. Figure 1). Notably, loss-  
267 of-p53 function may also indirectly increase the adaptability of AML cells to cytotoxic  
268 anti-cancer therapies, for example due to increased genomic instability [54].

269 In addition, the nutlin-3-adapted AML sub-lines displayed a noticeable  
270 heterogeneity in their responses to the anti-cancer drugs doxorubicin, etoposide,  
271 gemcitabine, cytarabine, and fludarabine. This also included the MV4-11 and OCI-  
272 AML-2 sub-lines, in which pre-existing *TP53*-mutant subpopulations had been selected  
273 by nutlin-3 treatment. Indeed, the highest fold change in the IC<sub>50</sub> between the most  
274 sensitive and the most resistant nutlin-3-adapted sub-line of a given parental cell line  
275 was observed in MV4-11. The most doxorubicin-resistant MV4-11 sub-line (MV4-  
276 11<sup>r</sup>Nutlin<sup>20μM</sup>VII) displayed a doxorubicin IC<sub>50</sub> of 26.0ng/mL, while the most  
277 doxorubicin-sensitive sub-line (MV4-11<sup>r</sup>Nutlin<sup>20μM</sup>XII) displayed a doxorubicin IC<sub>50</sub> of  
278 2.28ng/mL, resulting in an 11.4-fold difference. This indicates that the drug sensitivity  
279 profile of a nutlin-3-adapted AML subline cannot be predicted even if a defined pre-  
280 existing subpopulation of *TP53* mutant cells has been selected.

281 The doxorubicin and etoposide response profiles were more similar across the  
282 nutlin-3-adapted AML sub-lines than the sensitivity profiles of the other drugs. This  
283 may reflect a higher level of similarity between the mechanisms of action of doxorubicin  
284 and etoposide, which are both topoisomerase II inhibitors [57], compared to the other  
285 agents that are nucleoside analogues [58,59].

286 In conclusion, the investigation of 45 nutlin-3-adapted sub-lines of the AML cell  
287 lines MV4-11, OCI-AML-2, OCI-AML-3, and SIG-M5 showed that MDM2 inhibitors  
288 select, in dependence on the nature of a given AML cell population, pre-existing *TP53*-  
289 mutant subpopulations or induce *de novo TP53* mutations. Since MDM2 inhibitors are  
290 currently undergoing phase III clinical trials for the treatment of AML, patients should  
291 be monitored for the emergence of *TP53*-mutant leukaemia cells. The nutlin-3-adapted  
292 AML sub-lines showed a noticeable heterogeneity in their response to the cytotoxic  
293 anti-cancer drugs doxorubicin, etoposide, gemcitabine, cytarabine, and fludarabine.  
294 This indicates that even if a given cancer cell population is repeatedly adapted to the  
295 same drug in independent experiments, each adaptation follows an individual process  
296 resulting in a subpopulation with unique features. A substantial heterogeneity in the  
297 drug response was even observed in the MV4-11 and OCI-AML-2 sub-lines, in which  
298 nutlin-3 had selected pre-existing *TP53*-mutant subpopulations. Hence, future  
299 individualised treatment protocols will depend on the detailed monitoring of the  
300 evolutionary processes in cancer cell populations in response to therapy and an in-  
301 depth understanding of the therapeutic implications of the observed changes.



302 **Abbreviation list**

303 AML, acute myeloid leukaemia; IC50, concentration that inhibits cell viability by 50%;

304 MTT, 3-(4,5-dimethylthiazol-2-yl)-2,5-diphenyltetrazolium bromide

305 **Ethics approval and consent to participate**

306 Not applicable

307

308 **Consent for publication**

309 Not applicable

310

311 **Availability of data and materials**

312 All data generated or analysed during this study are included in this published article

313 and its supplementary information files.

314

315 **Competing interests**

316 The authors declare that they have no competing interests.

317

318 **Funding**

319 The work was supported by the Hilfe für krebskranke Kinder Frankfurt e.V., the

320 Frankfurter Stiftung für krebskranke Kinder, the Deutsche José Carreras Leukämie-

321 Stiftung, and the Kent Cancer Trust. The funding bodies had no role in the design of

322 the study, the collection, analysis, and interpretation of data, and in writing the

323 manuscript.

324

325 **Authors' contributions**

326 All authors analysed data and read and approved the final manuscript. MMi and JCjr  
327 directed the study and wrote the manuscript. CS, FR, TR, and JCjr were involved in  
328 the generation of the nutlin-3-resistant cell lines and sensitivity testing. MMe, AN, and  
329 TS were involved in the *TP53* sequencing and analysed the resulting data together  
330 with MM, DS, and JCjr.

331

332 **Acknowledgement**

333 Not applicable

334

## 335 **References**

- 336 1. Tisato V, Voltan R, Gonelli A, Secchiero P, Zauli G. MDM2/X inhibitors under clinical  
337 evaluation: perspectives for the management of hematological malignancies and  
338 pediatric cancer. *J Hematol Oncol.* 2017;10:133.
- 339 2. Wade M, Li YC, Wahl GM. MDM2, MDMX and p53 in oncogenesis and cancer  
340 therapy. *Nat Rev Cancer.* 2013;13:83-96.
- 341 3. Cinatl J Jr, Speidel D, Hardcastle I, Michaelis M. Resistance acquisition to MDM2  
342 inhibitors. *Biochem Soc Trans.* 2014;42:752-7.
- 343 4. Kojima K, Konopleva M, Samudio IJ, Shikami M, Cabreira-Hansen M, McQueen T,  
344 Ruvolo V, Tsao T, Zeng Z, Vassilev LT, Andreeff M. MDM2 antagonists induce p53-  
345 dependent apoptosis in AML: implications for leukemia therapy. *Blood.*  
346 2005;106:3150-9.
- 347 5. Kojima K, Konopleva M, Samudio IJ, Schober WD, Bornmann WG, Andreeff M.  
348 Concomitant inhibition of MDM2 and Bcl-2 protein function synergistically induce  
349 mitochondrial apoptosis in AML. *Cell Cycle.* 2006;5:2778-86.
- 350 6. Secchiero P, Zerbinati C, Melloni E, Milani D, Campioni D, Fadda R, Tiribelli M, Zauli  
351 G. The MDM-2 antagonist nutlin-3 promotes the maturation of acute myeloid leukemic  
352 blasts. *Neoplasia.* 2007;9:853-61.
- 353 7. Kojima K, Konopleva M, Tsao T, Nakakuma H, Andreeff M. Concomitant inhibition  
354 of Mdm2-p53 interaction and Aurora kinases activates the p53-dependent postmitotic  
355 checkpoints and synergistically induces p53-mediated mitochondrial apoptosis along  
356 with reduced endoreduplication in acute myelogenous leukemia. *Blood.*  
357 2008;112:2886-95.

- 358 8. Carter BZ, Mak DH, Schober WD, Koller E, Pinilla C, Vassilev LT, Reed JC, Andreeff  
359 M. Simultaneous activation of p53 and inhibition of XIAP enhance the activation of  
360 apoptosis signaling pathways in AML. *Blood*. 2010;115:306-14.
- 361 9. Kojima K, Konopleva M, Tsao T, Andreeff M, Ishida H, Shiotsu Y, Jin L, Tabe Y,  
362 Nakakuma H. Selective FLT3 inhibitor FI-700 neutralizes Mcl-1 and enhances p53-  
363 mediated apoptosis in AML cells with activating mutations of FLT3 through Mcl-1/Noxa  
364 axis. *Leukemia*. 2010;24:33-43.
- 365 10. Long J, Parkin B, Ouillette P, Bixby D, Shedden K, Erba H, Wang S, Malek SN.  
366 Multiple distinct molecular mechanisms influence sensitivity and resistance to MDM2  
367 inhibitors in adult acute myelogenous leukemia. *Blood*. 2010;116:71-80.
- 368 11. Samudio IJ, Duvvuri S, Clise-Dwyer K, Watt JC, Mak D, Kantarjian H, Yang D,  
369 Ruvolo V, Borthakur G. Activation of p53 signaling by MI-63 induces apoptosis in acute  
370 myeloid leukemia cells. *Leuk Lymphoma*. 2010;51:911-9.
- 371 12. Thompson T, Andreeff M, Studzinski GP, Vassilev LT. 1,25-dihydroxyvitamin D3  
372 enhances the apoptotic activity of MDM2 antagonist nutlin-3a in acute myeloid  
373 leukemia cells expressing wild-type p53. *Mol Cancer Ther*. 2010;9:1158-68.
- 374 13. Zhang W, Konopleva M, Burks JK, Dwyer KC, Schober WD, Yang JY, McQueen  
375 TJ, Hung MC, Andreeff M. Blockade of mitogen-activated protein kinase/extracellular  
376 signal-regulated kinase kinase and murine double minute synergistically induces  
377 Apoptosis in acute myeloid leukemia via BH3-only proteins Puma and Bim. *Cancer*  
378 *Res*. 2010;70:2424-34.
- 379 14. McCormack E, Haaland I, Venås G, Forthun RB, Huseby S, Gausdal G, Knappskog  
380 S, Micklem DR, Lorens JB, Bruserud O, Gjertsen BT. Synergistic induction of p53  
381 mediated apoptosis by valproic acid and nutlin-3 in acute myeloid leukemia. *Leukemia*.  
382 2012;26:910-7.

- 383 15. Haaland I, Opsahl JA, Berven FS, Reikvam H, Fredly HK, Haugse R, Thiede B,  
384 McCormack E, Lain S, Bruserud O, Gjertsen BT. Molecular mechanisms of nutlin-3  
385 involve acetylation of p53, histones and heat shock proteins in acute myeloid leukemia.  
386 *Mol Cancer*. 2014;13:116.
- 387 16. Weisberg E, Halilovic E, Cooke VG, Nonami A, Ren T, Sanda T, Simkin I, Yuan J,  
388 Antonakos B, Barys L, Ito M, Stone R, Galinsky I, Cowens K, Nelson E, Sattler M, Jeay  
389 S, Wuerthner JU, McDonough SM, Wiesmann M, Griffin JD. Inhibition of Wild-Type  
390 p53-Expressing AML by the Novel Small Molecule HDM2 Inhibitor CGM097. *Mol*  
391 *Cancer Ther*. 2015;14:2249-59.
- 392 17. Lehmann C, Friess T, Birzele F, Kiialainen A, Dangl M. Superior anti-tumor activity  
393 of the MDM2 antagonist idasanutlin and the Bcl-2 inhibitor venetoclax in p53 wild-type  
394 acute myeloid leukemia models. *J Hematol Oncol*. 2016;9:50.
- 395 18. Cassier PA, Castets M, Belhabri A, Vey N. Targeting apoptosis in acute myeloid  
396 leukaemia. *Br J Cancer*. 2017;117:1089-98.
- 397 19. Pan R, Ruvolo V, Mu H, Levenson JD, Nichols G, Reed JC, Konopleva M, Andreeff  
398 M. Synthetic Lethality of Combined Bcl-2 Inhibition and p53 Activation in AML:  
399 Mechanisms and Superior Antileukemic Efficacy. *Cancer Cell*. 2017;32:748-760.e6.
- 400 20. Seipel K, Marques MAT, Sidler C, Mueller BU, Pabst T. The Cellular p53 Inhibitor  
401 MDM2 and the Growth Factor Receptor FLT3 as Biomarkers for Treatment Responses  
402 to the MDM2-Inhibitor Idasanutlin and the MEK1 Inhibitor Cobimetinib in Acute Myeloid  
403 Leukemia. *Cancers (Basel)*. 2018;10. pii: E170.
- 404 21. Andreeff M, Kelly KR, Yee K, Assouline S, Strair R, Popplewell L, Bowen D,  
405 Martinelli G, Drummond MW, Vyas P, Kirschbaum M, Iyer SP, Ruvolo V, González  
406 GM, Huang X, Chen G, Graves B, Blotner S, Bridge P, Jukofsky L, Middleton S,  
407 Reckner M, Rueger R, Zhi J, Nichols G, Kojima K. Results of the Phase I Trial of

- 408 RG7112, a Small-Molecule MDM2 Antagonist in Leukemia. *Clin Cancer Res.*  
409 2016;22:868-76.
- 410 22. Ravandi F, Gojo I, Patnaik MM, Minden MD, Kantarjian H, Johnson-Levonas AO,  
411 Fancourt C, Lam R, Jones MB, Knox CD, Rose S, Patel PS, Tibes R. A phase I trial of  
412 the human double minute 2 inhibitor (MK-8242) in patients with refractory/recurrent  
413 acute myelogenous leukemia (AML). *Leuk Res.* 2016 Sep;48:92-100.
- 414 23. Reis B, Jukofsky L, Chen G, Martinelli G, Zhong H, So WV, Dickinson MJ,  
415 Drummond M, Assouline S, Hashemyan M, Theron M, Blotner S, Lee JH, Kasner M,  
416 Yoon SS, Rueger R, Seiter K, Middleton SA, Kelly KR, Vey N, Yee K, Nichols G, Chen  
417 LC, Pierceall WE. Acute myeloid leukemia patients' clinical response to idasanutlin  
418 (RG7388) is associated with pre-treatment MDM2 protein expression in leukemic  
419 blasts. *Haematologica.* 2016;101:e185-8.
- 420 24. Engelman JA, Zejnullahu K, Mitsudomi T, Song Y, Hyland C, Park JO, Lindeman  
421 N, Gale CM, Zhao X, Christensen J, Kosaka T, Holmes AJ, Rogers AM, Cappuzzo F,  
422 Mok T, Lee C, Johnson BE, Cantley LC, Jänne PA. MET amplification leads to gefitinib  
423 resistance in lung cancer by activating ERBB3 signaling. *Science.* 2007;316:1039-43.
- 424 25. Nazarian R, Shi H, Wang Q, Kong X, Koya RC, Lee H, Chen Z, Lee MK, Attar N,  
425 Sazegar H, Chodon T, Nelson SF, McArthur G, Sosman JA, Ribas A, Lo RS.  
426 Melanomas acquire resistance to B-RAF(V600E) inhibition by RTK or N-RAS  
427 upregulation. *Nature.* 2010;468:973-7.
- 428 26. Poulikakos PI, Persaud Y, Janakiraman M, Kong X, Ng C, Moriceau G, Shi H, Atefi  
429 M, Titz B, Gabay MT, Salton M, Dahlman KB, Tadi M, Wargo JA, Flaherty KT, Kelley  
430 MC, Misteli T, Chapman PB, Sosman JA, Graeber TG, Ribas A, Lo RS, Rosen N, Solit  
431 DB. RAF inhibitor resistance is mediated by dimerization of aberrantly spliced  
432 BRAF(V600E). *Nature.* 2011;480:387-90.

- 433 27. Domingo-Domenech J, Vidal SJ, Rodriguez-Bravo V, Castillo-Martin M, Quinn SA,  
434 Rodriguez-Barrueco R, Bonal DM, Charytonowicz E, Gladoun N, de la Iglesia-Vicente  
435 J, Petrylak DP, Benson MC, Silva JM, Cordon-Cardo C. Suppression of acquired  
436 docetaxel resistance in prostate cancer through depletion of notch- and hedgehog-  
437 dependent tumor-initiating cells. *Cancer Cell*. 2012;22:373-88.
- 438 28. Joseph JD, Lu N, Qian J, Sensintaffar J, Shao G, Brigham D, Moon M, Maneval  
439 EC, Chen I, Darimont B, Hager JH. A clinically relevant androgen receptor mutation  
440 confers resistance to second-generation antiandrogens enzalutamide and ARN-509.  
441 *Cancer Discov*. 2013;3:1020-9.
- 442 29. Korpál M, Korn JM, Gao X, Rakiec DP, Ruddy DA, Doshi S, Yuan J, Kovats SG,  
443 Kim S, Cooke VG, Monahan JE, Stegmeier F, Roberts TM, Sellers WR, Zhou W, Zhu  
444 P. An F876L mutation in androgen receptor confers genetic and phenotypic resistance  
445 to MDV3100 (enzalutamide). *Cancer Discov*. 2013;3:1030-43.
- 446 30. Crystal AS, Shaw AT, Sequist LV, Friboulet L, Niederst MJ, Lockerman EL, Frias  
447 RL, Gainor JF, Amzallag A, Greninger P, Lee D, Kalsy A, Gomez-Caraballo M, Elamine  
448 L, Howe E, Hur W, Lifshits E, Robinson HE, Katayama R, Faber AC, Awad MM,  
449 Ramaswamy S, Mino-Kenudson M, Iafrate AJ, Benes CH, Engelman JA. Patient-  
450 derived models of acquired resistance can identify effective drug combinations for  
451 cancer. *Science*. 2014;346:1480-6.
- 452 31. Niederst MJ, Sequist LV, Poirier JT, Mermel CH, Lockerman EL, Garcia AR,  
453 Katayama R, Costa C, Ross KN, Moran T, Howe E, Fulton LE, Mulvey HE, Bernardo  
454 LA, Mohamoud F, Miyoshi N, VanderLaan PA, Costa DB, Jänne PA, Borger DR,  
455 Ramaswamy S, Shioda T, Iafrate AJ, Getz G, Rudin CM, Mino-Kenudson M, Engelman  
456 JA. RB loss in resistant EGFR mutant lung adenocarcinomas that transform to small-  
457 cell lung cancer. *Nat Commun*. 2015;6:6377.

- 458 32. Göllner S, Oellerich T, Agrawal-Singh S, Schenk T, Klein HU, Rohde C, Pabst C,  
459 Sauer T, Lerdrup M, Tavor S, Stölzel F, Herold S, Ehninger G, Köhler G, Pan KT,  
460 Urlaub H, Serve H, Dugas M, Spiekermann K, Vick B, Jeremias I, Berdel WE, Hansen  
461 K, Zelent A, Wickenhauser C, Müller LP, Thiede C, Müller-Tidow C. Loss of the histone  
462 methyltransferase EZH2 induces resistance to multiple drugs in acute myeloid  
463 leukemia. *Nat Med.* 2017;23:69-78.
- 464 33. Schneider C, Oellerich T, Baldauf HM, Schwarz SM, Thomas D, Flick R,  
465 Bohnenberger H, Kaderali L, Stegmann L, Cremer A, Martin M, Lohmeyer J, Michaelis  
466 M, Hornung V, Schliemann C, Berdel WE, Hartmann W, Wardelmann E, Comoglio F,  
467 Hansmann ML, Yakunin AF, Geisslinger G, Ströbel P, Ferreirós N, Serve H, Keppler  
468 OT, Cinatl J Jr. SAMHD1 is a biomarker for cytarabine response and a therapeutic  
469 target in acute myeloid leukemia. *Nat Med.* 2017;23:250-5.
- 470 34. Aziz MH, Shen H, Maki CG. Acquisition of p53 mutations in response to the non-  
471 genotoxic p53 activator Nutlin-3. *Oncogene.* 2011 Nov 17;30(46):4678-86.
- 472 35. Michaelis M, Rothweiler F, Barth S, Cinatl J, van Rikxoort M, Löschmann N, Voges  
473 Y, Breitling R, von Deimling A, Rödel F, Weber K, Fehse B, Mack E, Stiewe T, Doerr  
474 HW, Speidel D, Cinatl J Jr. Adaptation of cancer cells from different entities to the  
475 MDM2 inhibitor nutlin-3 results in the emergence of p53-mutated multi-drug-resistant  
476 cancer cells. *Cell Death Dis.* 2011;2:e243.
- 477 36. Michaelis M, Rothweiler F, Agha B, Barth S, Voges Y, Löschmann N, von Deimling  
478 A, Breitling R, Doerr HW, Rödel F, Speidel D, Cinatl J Jr. Human neuroblastoma cells  
479 with acquired resistance to the p53 activator RITA retain functional p53 and sensitivity  
480 to other p53 activating agents. *Cell Death Dis.* 2012;3:e294.
- 481 37. Jones RJ, Bjorklund CC, Baladandayuthapani V, Kuhn DJ, Orlowski RZ. Drug  
482 resistance to inhibitors of the human double minute-2 E3 ligase is mediated by point



- 483 mutations of p53, but can be overcome with the p53 targeting agent RITA. *Mol Cancer*  
484 *Ther.* 2012;11:2243-53.
- 485 38. Hoffman-Luca CG, Ziazadeh D, McEachern D, Zhao Y, Sun W, Debussche L,  
486 Wang S. Elucidation of Acquired Resistance to Bcl-2 and MDM2 Inhibitors in Acute  
487 Leukemia In Vitro and In Vivo. *Clin Cancer Res.* 2015;21:2558-68.
- 488 39. Drummond CJ, Esfandiari A, Liu J, Lu X, Hutton C, Jackson J, Bennaceur K, Xu  
489 Q, Makimanejavali AR, Del Bello F, Piergentili A, Newell DR, Hardcastle IR, Griffin RJ,  
490 Lunec J. TP53 mutant MDM2-amplified cell lines selected for resistance to MDM2-p53  
491 binding antagonists retain sensitivity to ionizing radiation. *Oncotarget.* 2016;7:46203-  
492 46218.
- 493 40. Jung J, Lee JS, Dickson MA, Schwartz GK, Le Cesne A, Varga A, Bahleda R,  
494 Wagner AJ, Choy E, de Jonge MJ, Light M, Rowley S, Macé S, Watters J. TP53  
495 mutations emerge with MDM2 inhibitor SAR405838 treatment in de-differentiated  
496 liposarcoma. *Nat Commun.* 2016;7:12609.
- 497 41. Hata AN, Rowley S, Archibald HL, Gomez-Caraballo M, Siddiqui FM, Ji F, Jung J,  
498 Light M, Lee JS, Debussche L, Sidhu S, Sadreyev RI, Watters J, Engelman JA.  
499 Synergistic activity and heterogeneous acquired resistance of combined MDM2 and  
500 MEK inhibition in KRAS mutant cancers. *Oncogene.* 2017;36:6581-91.
- 501 42. Vassilev LT, Vu BT, Graves B, Carvajal D, Podlaski F, Filipovic Z, Kong N,  
502 Kammlott U, Lukacs C, Klein C, Fotouhi N, Liu EA. In vivo activation of the p53 pathway  
503 by small-molecule antagonists of MDM2. *Science.* 2004;303:844-8.
- 504 43. Michaelis M, Wass MN, Cinatl J jr. The Resistant Cancer Cell Line (RCCL)  
505 Collection. [https://research.kent.ac.uk/ibc/the-resistant-cancer-cell-line-rccl-](https://research.kent.ac.uk/ibc/the-resistant-cancer-cell-line-rccl-collection/)  
506 [collection/](https://research.kent.ac.uk/ibc/the-resistant-cancer-cell-line-rccl-collection/). Accessed 17 Aug 2018.

- 507 44. Michaelis M, Agha B, Rothweiler F, Löschmann N, Voges Y, Mittelbronn M,  
508 Starzetz T, Harter PN, Abhari BA, Fulda S, Westermann F, Riecken K, Spek S, Langer  
509 K, Wiese M, Dirks WG, Zehner R, Cinatl J, Wass MN, Cinatl J Jr. Identification of  
510 flubendazole as potential anti-neuroblastoma compound in a large cell line screen. *Sci*  
511 *Rep.* 2015;5:8202.
- 512 45. Weber K, Bartsch U, Stocking C, Fehse B. A multicolor panel of novel lentiviral  
513 "gene ontology" (LeGO) vectors for functional gene analysis. *Mol Ther.* 2008;16:698-  
514 706.
- 515 46. Riecken K. Lentiviral Gene Ontology Vectors. <http://www.lentigo-vectors.de>.  
516 Accessed 17 Aug 2018.
- 517 47. Voges Y, Michaelis M, Rothweiler F, Schaller T, Schneider C, Politt K, Mernberger  
518 M, Nist A, Stiewe T, Wass MN, Rödel F, Cinatl J. Effects of YM155 on survivin levels  
519 and viability in neuroblastoma cells with acquired drug resistance. *Cell Death Dis.*  
520 2016;7:e2410.
- 521 48. Li H, Handsaker B, Wysoker A, Fennell T, Ruan J, Homer N, Marth G, Abecasis  
522 G, Durbin R; 1000 Genome Project Data Processing Subgroup. The Sequence  
523 Alignment/Map format and SAMtools. *Bioinformatics.* 2009;25:2078-9.
- 524 49. Koboldt DC, Zhang Q, Larson DE, Shen D, McLellan MD, Lin L, Miller CA, Mardis  
525 ER, Ding L, Wilson RK. VarScan 2: somatic mutation and copy number alteration  
526 discovery in cancer by exome sequencing. *Genome Res.* 2012;22:568-76.
- 527 50. Zondlo SC, Lee AE, Zondlo NJ. Determinants of specificity of MDM2 for the  
528 activation domains of p53 and p65: proline27 disrupts the MDM2-binding motif of p53.  
529 *Biochemistry.* 2006;45:11945-57.
- 530 51. Stiewe T, Haran TE. How mutations shape p53 interactions with the genome to  
531 promote tumorigenesis and drug resistance. *Drug Resist Updat.* 2018;38:27-43.

- 532 52. Bouaoun L, Sonkin D, Ardin M, Hollstein M, Byrnes G, Zavadil J, Olivier M. TP53  
533 Variations in Human Cancers: New Lessons from the IARC TP53 Database and  
534 Genomics Data. *Hum Mutat.* 2016;37:865-76.
- 535 53. The IARC TP53 Database. <http://p53.iarc.fr>. Accessed 1 Aug 2018.
- 536 54. Prokocimer M, Molchadsky A, Rotter V. Dysfunctional diversity of p53 proteins in  
537 adult acute myeloid leukemia: projections on diagnostic workup and therapy. *Blood.*  
538 2017;130:699-712.
- 539 55. Wong TN, Ramsingh G, Young AL, Miller CA, Touma W, Welch JS, Lamprecht TL,  
540 Shen D, Hundal J, Fulton RS, Heath S, Baty JD, Klco JM, Ding L, Mardis ER,  
541 Westervelt P, DiPersio JF, Walter MJ, Graubert TA, Ley TJ, Druley T, Link DC, Wilson  
542 RK. Role of TP53 mutations in the origin and evolution of therapy-related acute myeloid  
543 leukaemia. *Nature.* 2015;518():552-5.
- 544 56. Wong TN, Miller CA, Jotte MRM, Bagegni N, Baty JD, Schmidt AP, Cashen AF,  
545 Duncavage EJ, Helton NM, Fiala M, Fulton RS, Heath SE, Janke M, Lubber K,  
546 Westervelt P, Vij R, DiPersio JF, Welch JS, Graubert TA, Walter MJ, Ley TJ, Link DC.  
547 Cellular stressors contribute to the expansion of hematopoietic clones of varying  
548 leukemic potential. *Nat Commun.* 2018;9:455.
- 549 57. Pommier Y, Leo E, Zhang H, Marchand C. DNA topoisomerases and their  
550 poisoning by anticancer and antibacterial drugs. *Chem Biol.* 2010;17:421-33.
- 551 58. Binenbaum Y, Na'ara S, Gil Z. Gemcitabine resistance in pancreatic ductal  
552 adenocarcinoma. *Drug Resist Updat.* 2015;23:55-68.
- 553 59. Tamamyian G, Kadia T, Ravandi F, Borthakur G, Cortes J, Jabbour E, Daver N,  
554 Ohanian M, Kantarjian H, Konopleva M. Frontline treatment of acute myeloid leukemia  
555 in adults. *Crit Rev Oncol Hematol.* 2017;110:20-34.
- 556

557 **Table 1.** *TP53* mutation status of AML cell lines and their nutlin-3-adapted sub-lines.  
558

| Cell Line                                                               | <i>TP53</i> mutation status                          |
|-------------------------------------------------------------------------|------------------------------------------------------|
| MV4-11                                                                  | wild type                                            |
| MV4-11 <sup>r</sup> Nutlin <sup>20μM</sup> I-XV                         | R248W (het) <sup>1,2</sup>                           |
| OCI-AML-2                                                               | wild type                                            |
| OCI-AML-2 <sup>r</sup> Nutlin <sup>20μM</sup> I-V, VII, VIII, X, XI, XV | Y220C (het) <sup>2</sup>                             |
| OCI-AML-3                                                               | wild type                                            |
| OCI-AML-3 <sup>r</sup> Nutlin <sup>20μM</sup> I                         | R196* <sup>3</sup> (hom)                             |
| OCI-AML-3 <sup>r</sup> Nutlin <sup>20μM</sup> IV                        | R273S (het)                                          |
| OCI-AML-3 <sup>r</sup> Nutlin <sup>20μM</sup> V                         | S215G (het)                                          |
| OCI-AML-3 <sup>r</sup> Nutlin <sup>20μM</sup> VI                        | C176F (het)                                          |
| OCI-AML-3 <sup>r</sup> Nutlin <sup>20μM</sup> VII                       | G244S (het)                                          |
| OCI-AML-3 <sup>r</sup> Nutlin <sup>20μM</sup> VIII                      | wild-type                                            |
| OCI-AML-3 <sup>r</sup> Nutlin <sup>20μM</sup> IX                        | c.485 del 6bp (TCTACA) het,<br>IYK->K (p.162..p.164) |
| OCI-AML-3 <sup>r</sup> Nutlin <sup>20μM</sup> XI                        | G266V (het)                                          |
| OCI-AML-3 <sup>r</sup> Nutlin <sup>20μM</sup> XII                       | wild type                                            |
| OCI-AML-3 <sup>r</sup> Nutlin <sup>20μM</sup> XIII                      | wild type                                            |
| OCI-AML-3 <sup>r</sup> Nutlin <sup>20μM</sup> XIV                       | S215G (het)                                          |
| OCI-AML-3 <sup>r</sup> Nutlin <sup>20μM</sup> XV                        | R248Q (het)                                          |
| SIG-M5                                                                  | wild type                                            |
| SIG-M5 <sup>r</sup> Nutlin <sup>20μM</sup> III                          | wild type                                            |
| SIG-M5 <sup>r</sup> Nutlin <sup>20μM</sup> IV                           | K132E (hom)                                          |
| SIG-M5 <sup>r</sup> Nutlin <sup>20μM</sup> VI                           | R282W (het)                                          |
| SIG-M5 <sup>r</sup> Nutlin <sup>20μM</sup> VIII                         | P27S (het)                                           |
| SIG-M5 <sup>r</sup> Nutlin <sup>20μM</sup> IX                           | wild type                                            |
| SIG-M5 <sup>r</sup> Nutlin <sup>20μM</sup> XI                           | c.196 del A (->Stop in Codon),<br>V173L (het)        |
| SIG-M5 <sup>r</sup> Nutlin <sup>20μM</sup> XV                           | wild type                                            |
| SIG-M5 <sup>r</sup> Nutlin <sup>20μM</sup> XX                           | wild type                                            |

559  
560 <sup>1</sup> het, heterozygous; hom, homozygous  
561 <sup>2</sup> All sub-lines share the identical mutation  
562 <sup>3</sup> stop codon

563 **Figure legends**

564 **Figure 1.** Drug sensitivity profiles of the AML cell line MV4-11 and its sub-lines adapted  
565 to nutlin-3 (20 $\mu$ M). Concentrations that inhibit cell viability by 50% (IC<sub>50</sub>) as determined  
566 by MTT assay after 120h incubation and relative sensitivity expressed as fold change  
567 (IC<sub>50</sub> nutlin-3-resistant MV4-11 sub-line/ IC<sub>50</sub> MV4-11). Numerical data are presented  
568 in Suppl. Table 1.

569

570 **Figure 2.** Drug sensitivity profiles of the AML cell line OCI-AML-2 and its sub-lines  
571 adapted to nutlin-3 (20 $\mu$ M). Concentrations that inhibit cell viability by 50% (IC<sub>50</sub>) as  
572 determined by MTT assay after 120h incubation and relative sensitivity expressed as  
573 fold change (IC<sub>50</sub> nutlin-3-resistant OCI-AML-2 sub-line/ IC<sub>50</sub> OCI-AML-2). Numerical  
574 data are presented in Suppl. Table 1.

575

576 **Figure 3.** Drug sensitivity profiles of the AML cell line OCI-AML-3 and its sub-lines  
577 adapted to nutlin-3 (20 $\mu$ M). Concentrations that inhibit cell viability by 50% (IC<sub>50</sub>) as  
578 determined by MTT assay after 120h incubation and relative sensitivity expressed as  
579 fold change (IC<sub>50</sub> nutlin-3-resistant OCI-AML-3 sub-line/ IC<sub>50</sub> OCI-AML-3). Numerical  
580 data are presented in Suppl. Table 1.

581

582 **Figure 4.** Drug sensitivity profiles of the AML cell line SIG-M5 and its sub-lines adapted  
583 to nutlin-3 (20 $\mu$ M). Concentrations that inhibit cell viability by 50% (IC<sub>50</sub>) as determined  
584 by MTT assay after 120h incubation and relative sensitivity expressed as fold change  
585 (IC<sub>50</sub> nutlin-3-resistant SIG-M5 sub-line/ IC<sub>50</sub> SIG-M5). Numerical data are presented  
586 in Suppl. Table 1.

587

588 **Figure 5.** Distribution of the nutlin-3 IC50 values in the nutlin-3-adapted AML sub-lines.  
589 The IC50 values are presented as they are and as fold changes (nutlin-3 IC50 nutlin-  
590 3-adapted sub-line/ nutlin-3 IC50 respective parental cell line). In addition, the  
591 distribution of the nutlin-3 IC50 values is presented in the nutlin-3-adapted OCI-AML-  
592 3- and SIG-M5-sub-lines in dependence of their *TP53* mutation status. Numerical data  
593 are presented in Suppl. Table 1.

594

595 **Figure 6.** Nutlin-3-adapted AML sub-lines that display decreased, similar, or increased  
596 sensitivity to doxorubicin, etoposide, gemcitabine, cytarabine, or fludarabine relative to  
597 the respective parental cell lines. The nutlin-3-adapted AML sub-lines were  
598 categorised as cell lines that display a higher drug sensitivity than the respective  
599 parental cell line (IC50 nutlin-3-adapted sub-line/ IC50 respective parental cell line  
600 <0.5, blue bars), a similar drug sensitivity as the respective parental cell line (IC50  
601 nutlin-3-adapted sub-line/ IC50 respective parental cell line >0.5 and <2, yellow bars),  
602 or a lower drug sensitivity than the respective parental cell line (IC50 nutlin-3-adapted  
603 sub-line/ IC50 respective parental cell line >2, purple bars). Numerical data are  
604 presented in Suppl. Table 1.

605

606 **Figure 7.** Comparison of the response of individual nutlin-3-adapted AML sub-lines to  
607 doxorubicin, etoposide, gemcitabine, cytarabine, or fludarabine. The fold change IC50  
608 sub-line with the highest IC50/ IC50 sub-line with the lowest IC50 are presented for  
609 each drug in the nutlin-3-adapted sub-lines of MV4-11, OCI-AML-2, OCI-AML-3, and  
610 SIG-M5. In addition, the distribution of the IC50s of the individual cell lines are shown.

**Figure 1**

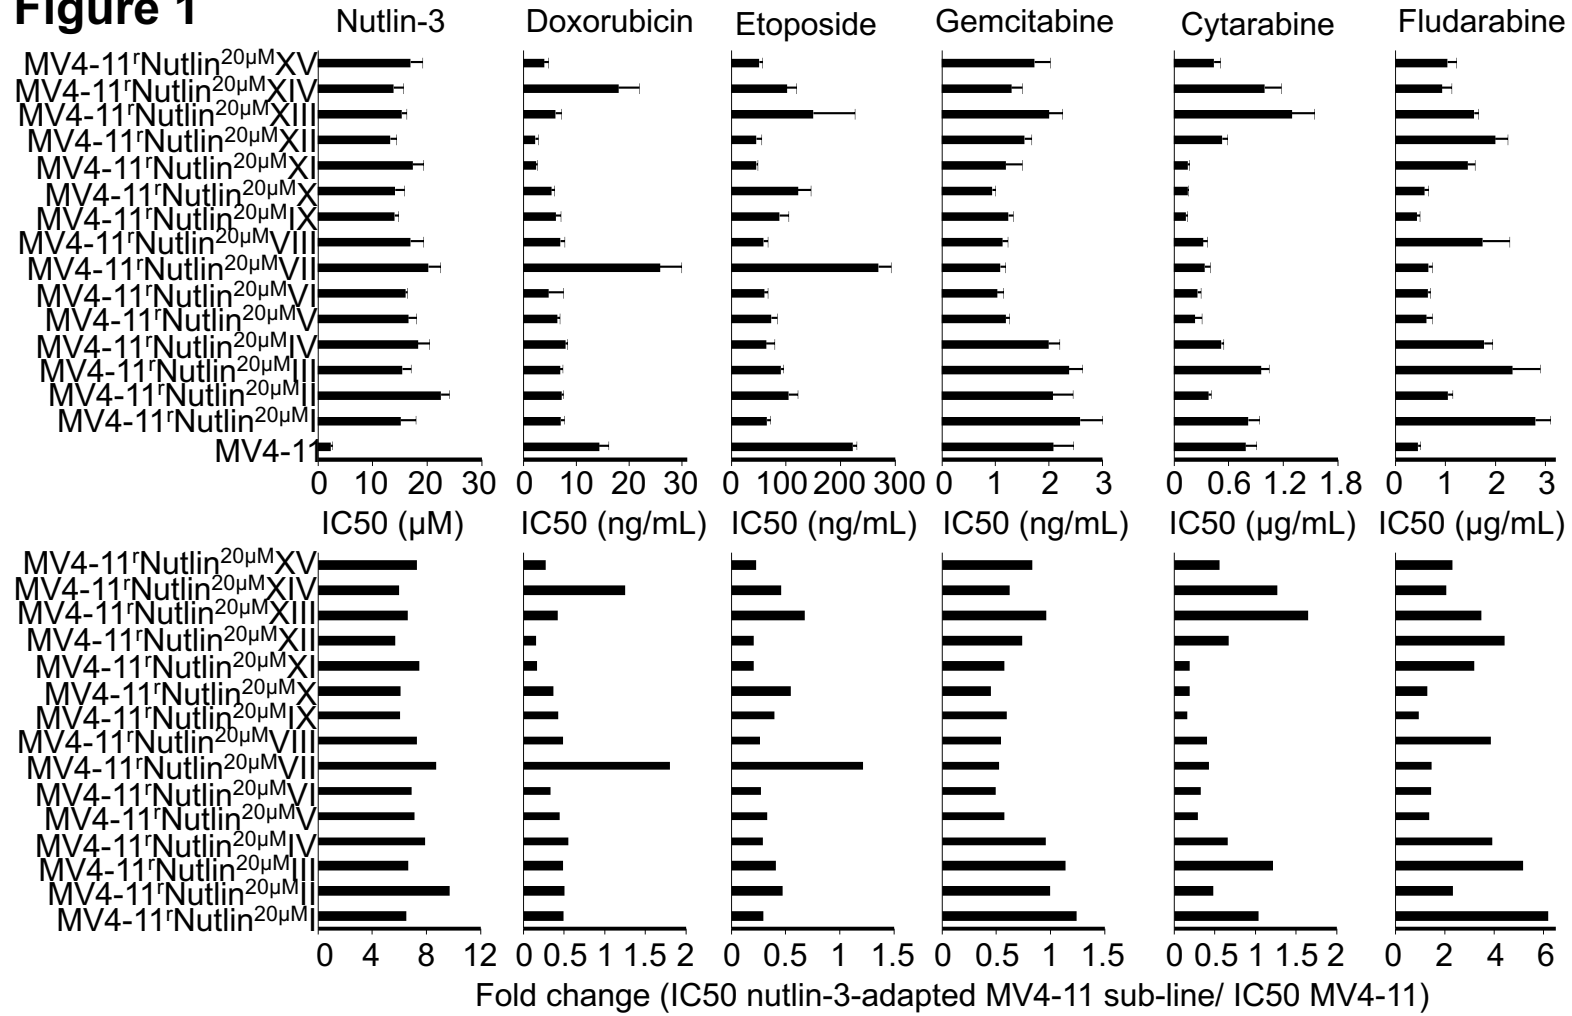

611

612

**Figure 2**

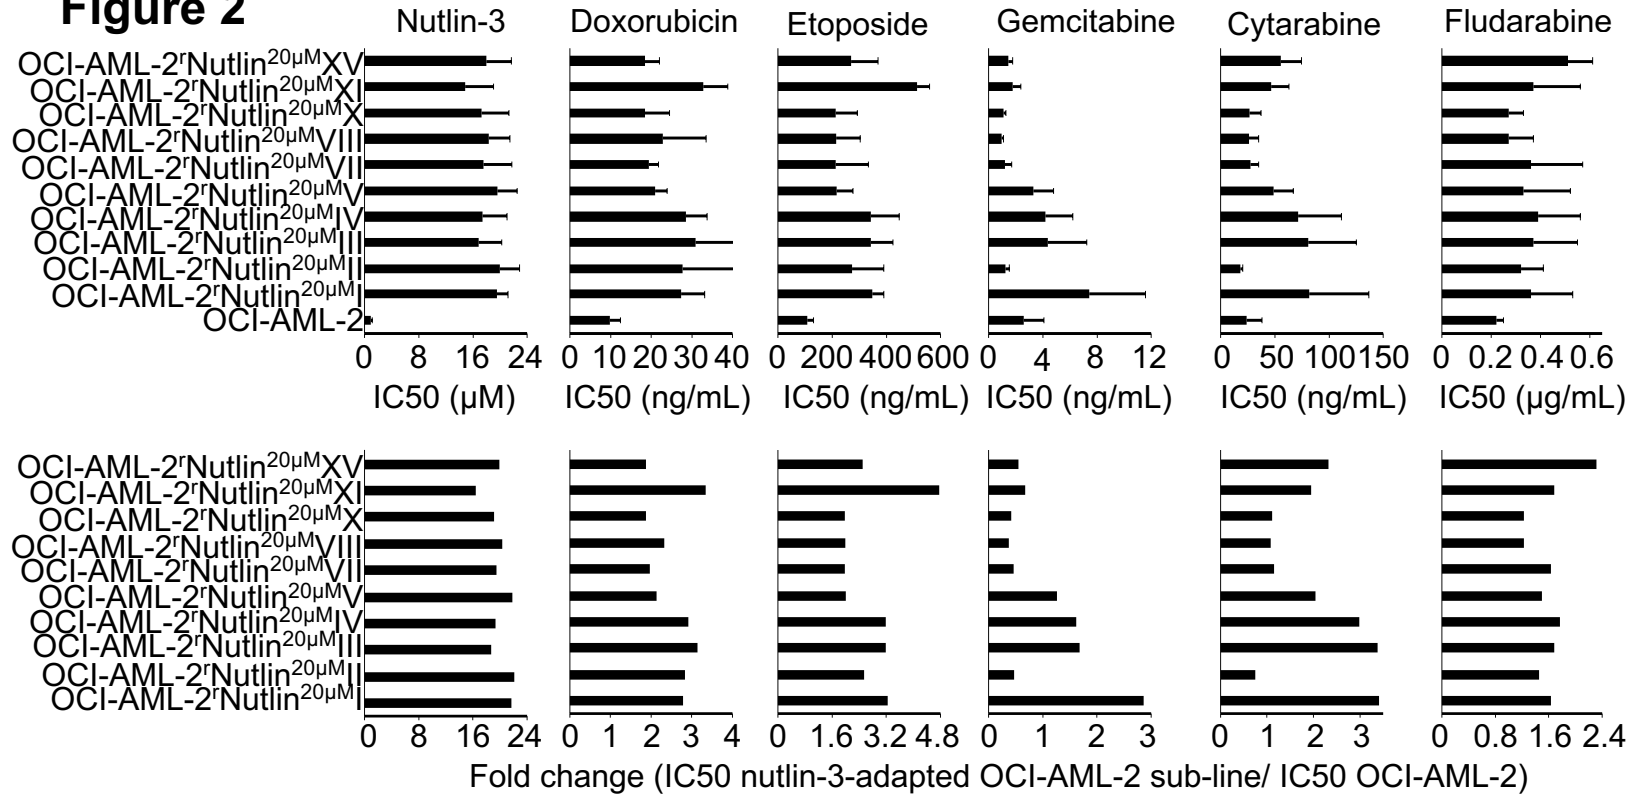

613

614



**Figure 3**

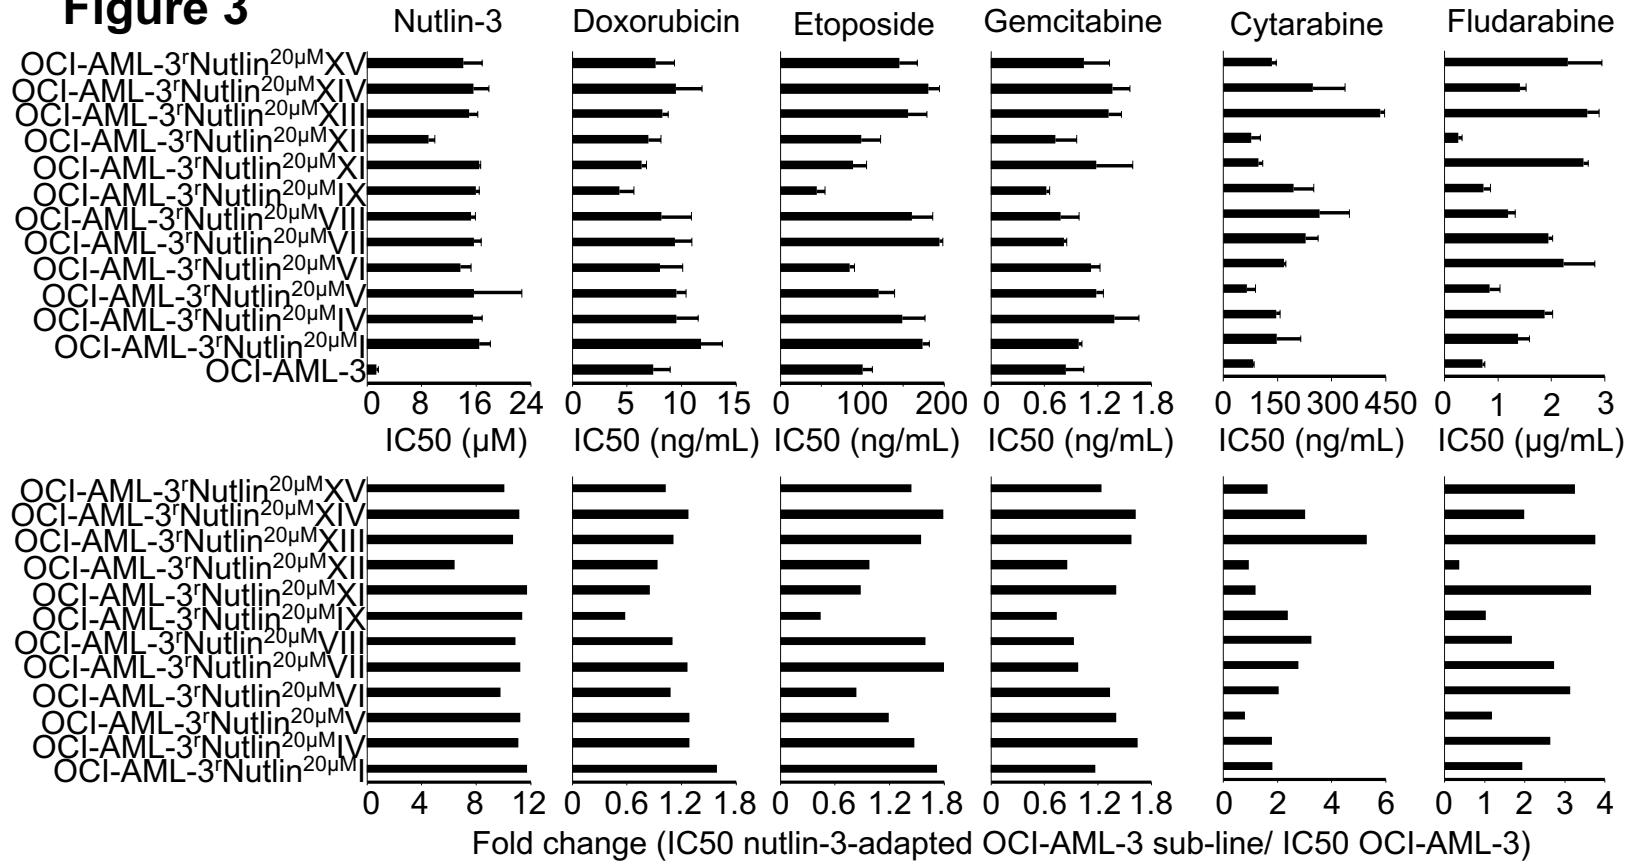

615

616

**Figure 4**

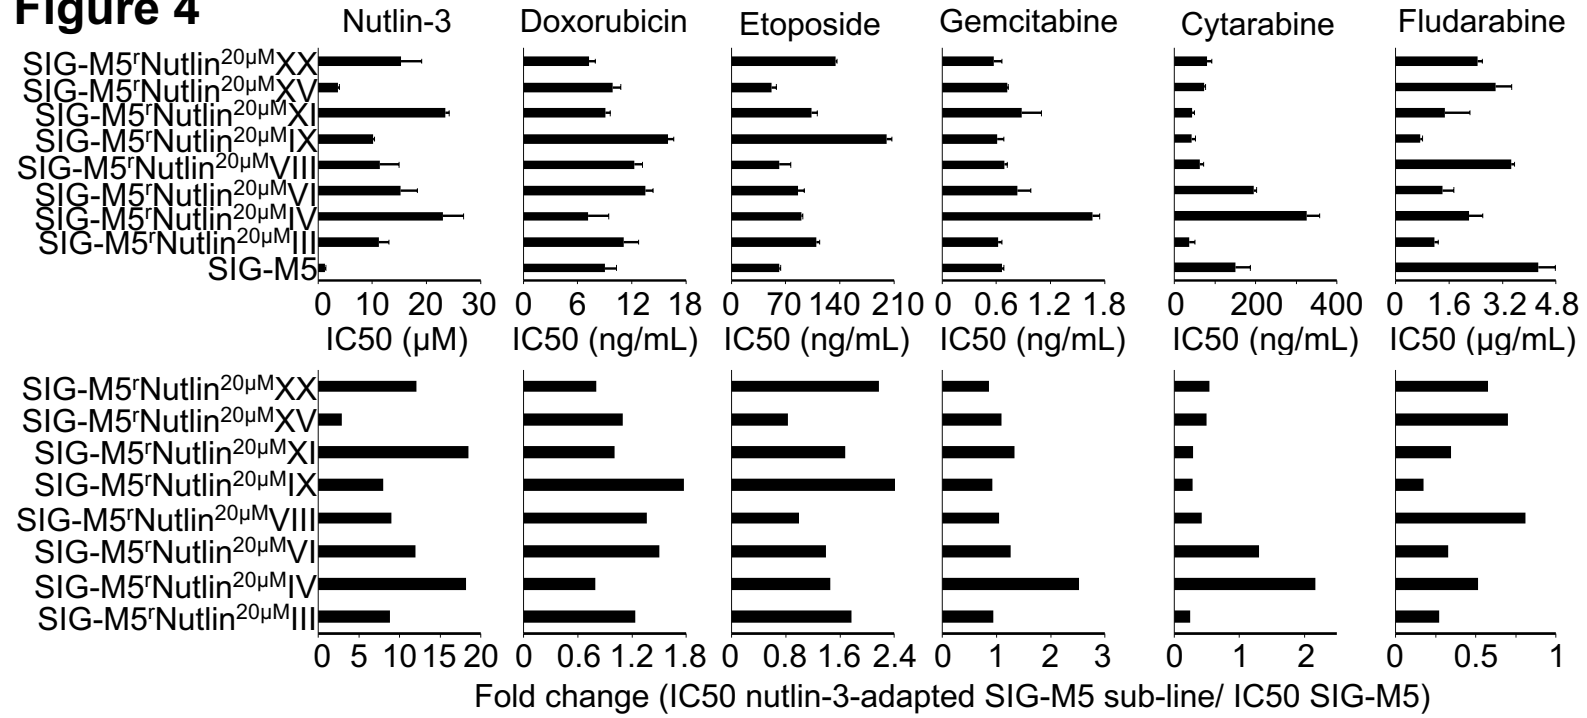

617

618

**Figure 5**

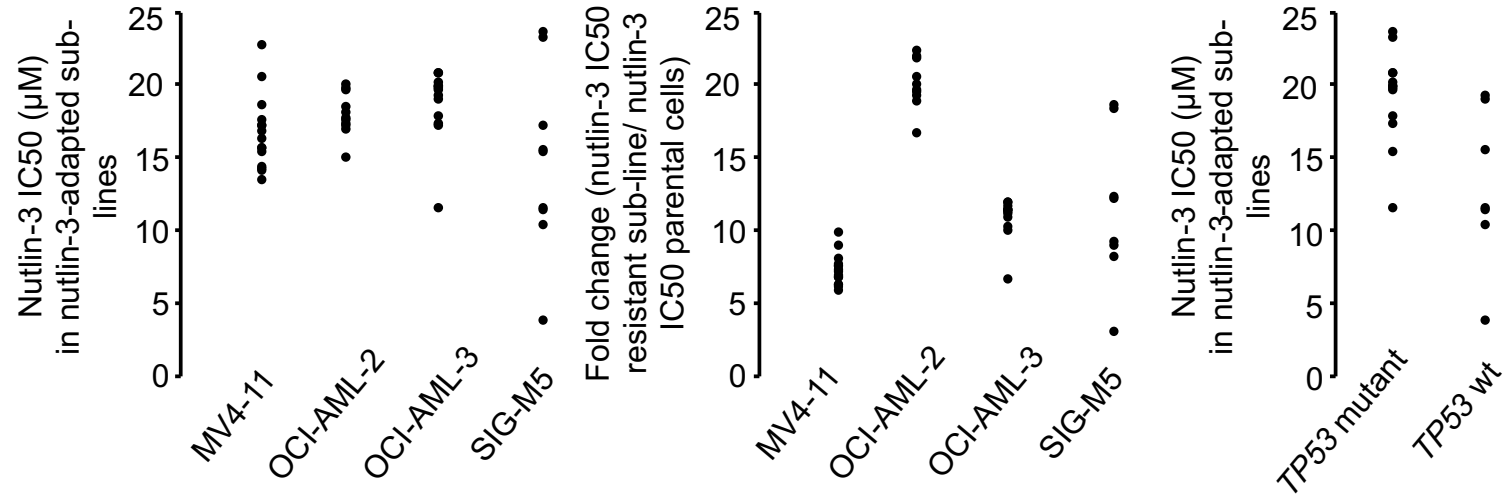

619

620

**Figure 6**

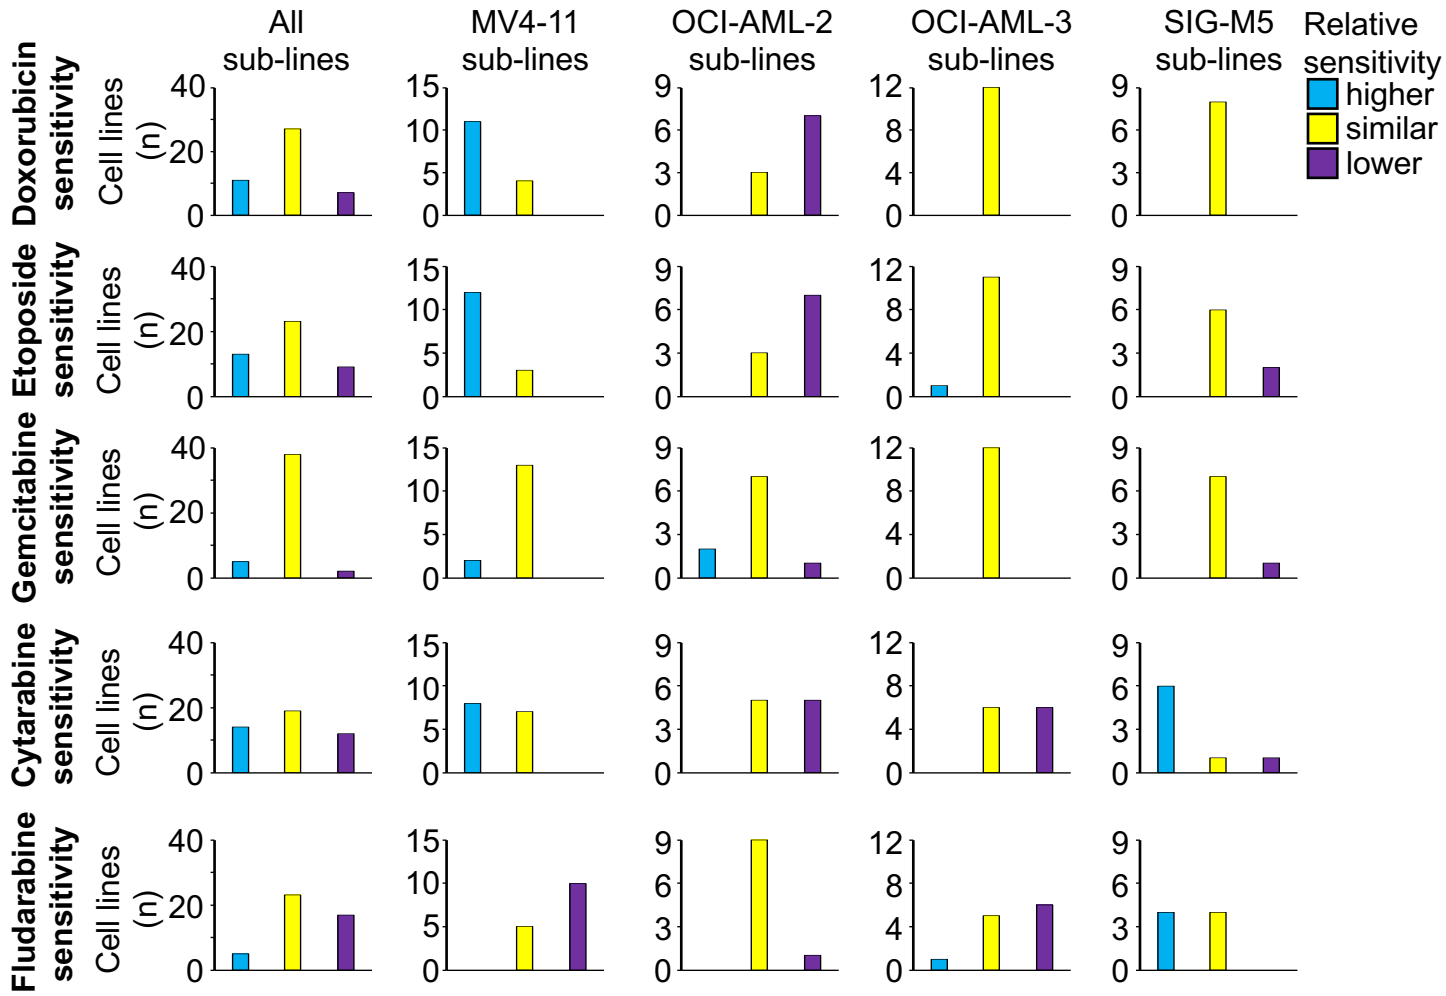

**Figure 7**

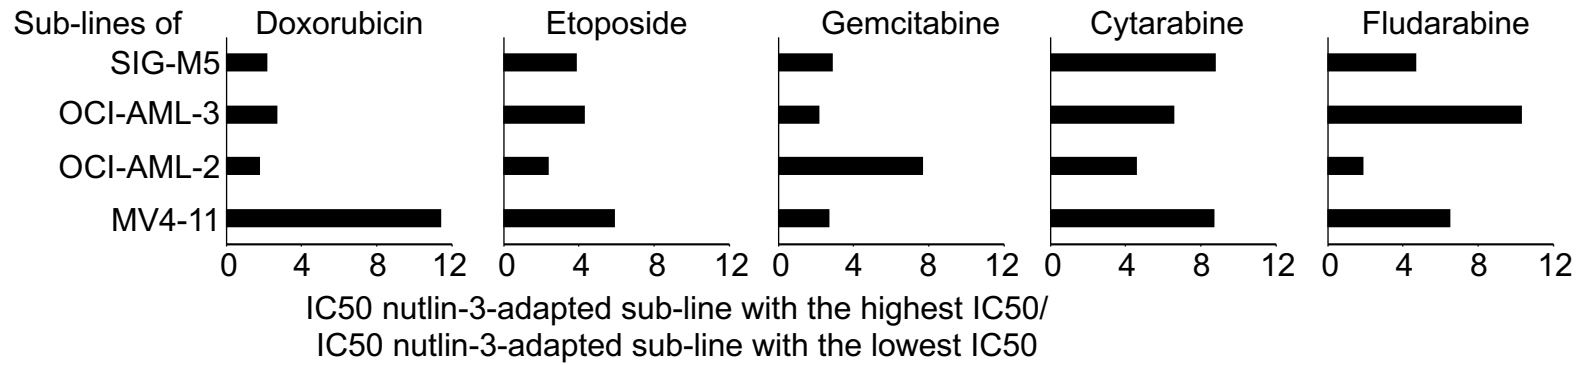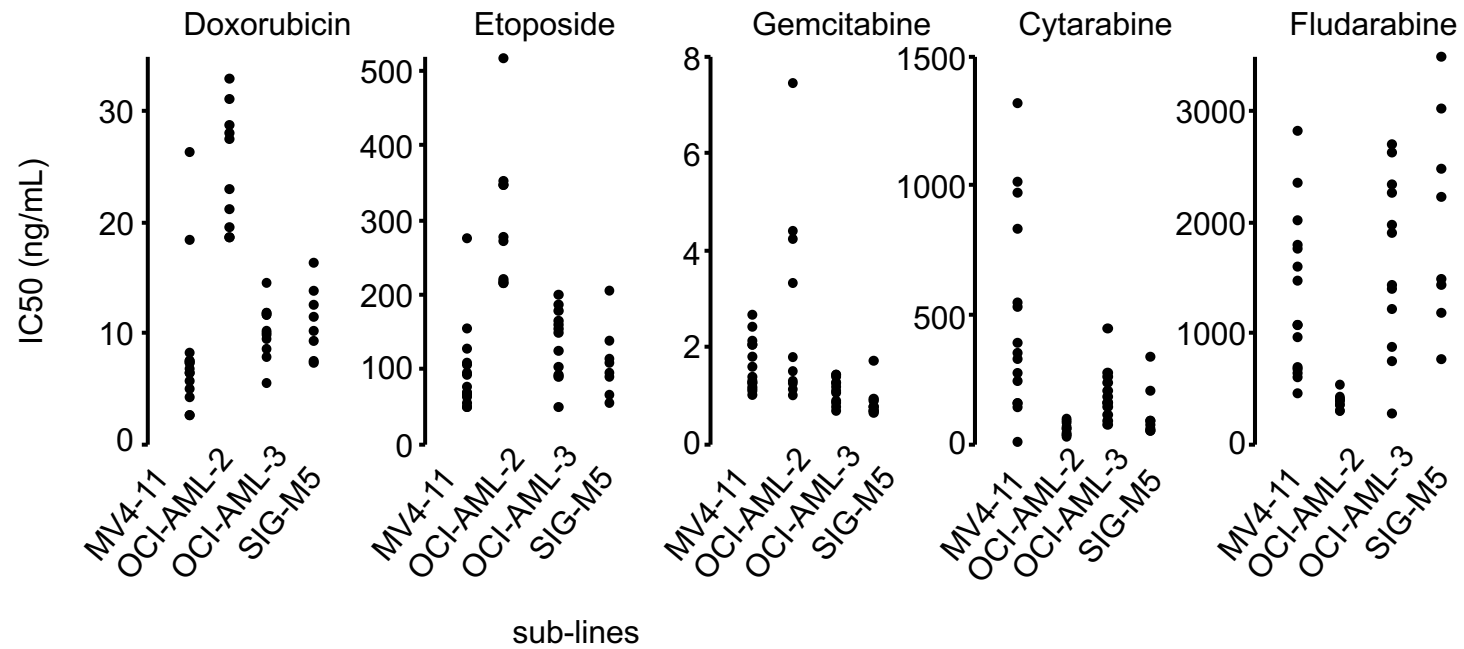

## Suppl. Figure 1

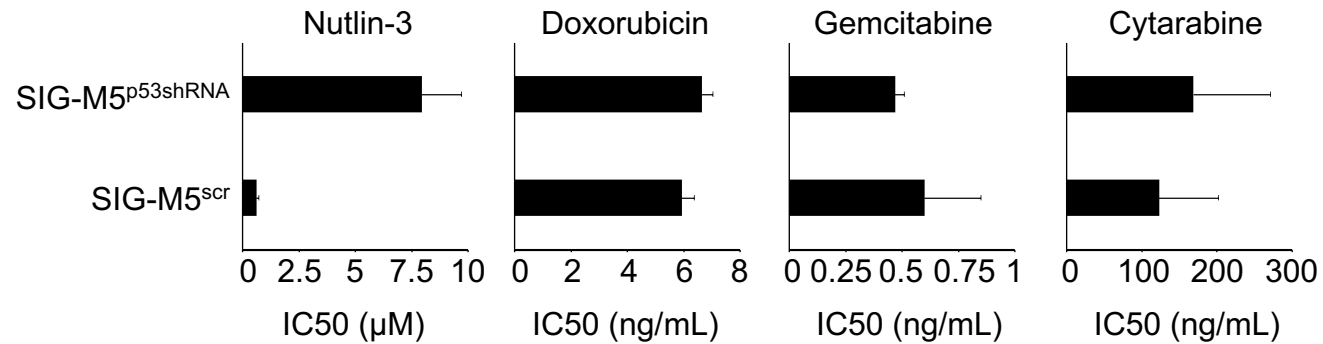

**Suppl. Figure 1.** Drug sensitivity in SIG-M5 cells transduced with a lentiviral control vector encoding non-targeting ('scrambled') shRNA (SIG-M5<sup>scr</sup>) and SIG-M5 cells transduced with a lentiviral vector encoding shRNA targeting p53 (SIG-M5<sup>p53shRNA</sup>). Concentrations that reduce cell viability by 50% (IC50) were determined by MTT assay after 120h of incubation.

623

624

625

**Suppl. Table 1.** TP53 status and drug sensitivity profiles in AML cell lines and their sub-lines adapted to nutlin-3 (20µM).

| Cell line                                       | TP53 status              | Drug concentration that reduces cell viability by 50% (IC50) <sup>1</sup> |                        |                       |                        |                       |                        |
|-------------------------------------------------|--------------------------|---------------------------------------------------------------------------|------------------------|-----------------------|------------------------|-----------------------|------------------------|
|                                                 |                          | nutlin-3<br>(µM)                                                          | doxorubicin<br>(ng/mL) | etoposide<br>(ng/mL)  | gemcitabine<br>(ng/mL) | cytarabine<br>(µg/mL) | fludarabine<br>(µg/mL) |
| MV4-11                                          | wild type                | 2.33 ± 0.35                                                               | 14.4 ± 1.8             | 223 ± 7               | 2.08 ± 0.38            | 0.79 ± 0.12           | 0.45 ± 0.05            |
| MV4-11 <sup>r</sup> Nutlin <sup>20µM</sup> I    | R248W (het) <sup>2</sup> | 15.2 ± 2.8<br>(6.52) <sup>3</sup>                                         | 7.15 ± 0.68<br>(0.49)  | 65.3 ± 6.9<br>(0.29)  | 2.58 ± 0.42<br>(1.24)  | 0.82 ± 0.12<br>(1.04) | 2.79 ± 0.31<br>(6.20)  |
| MV4-11 <sup>r</sup> Nutlin <sup>20µM</sup> II   | R248W (het)              | 22.6 ± 1.5<br>(9.70)                                                      | 7.23 ± 0.36<br>(0.50)  | 106 ± 17<br>(0.47)    | 2.07 ± 0.38<br>(1.00)  | 0.38 ± 0.03<br>(0.48) | 1.05 ± 0.10<br>(2.33)  |
| MV4-11 <sup>r</sup> Nutlin <sup>20µM</sup> III  | R248W (het)              | 15.5 ± 1.6<br>(6.65)                                                      | 6.99 ± 0.56<br>(0.48)  | 91.2 ± 4.9<br>(0.41)  | 2.37 ± 0.26<br>(1.14)  | 0.96 ± 0.09<br>(1.22) | 2.33 ± 0.56<br>(5.18)  |
| MV4-11 <sup>r</sup> Nutlin <sup>20µM</sup> IV   | R248W (het)              | 18.4 ± 2.1<br>(7.90)                                                      | 8.00 ± 0.42<br>(0.55)  | 64.3 ± 15.5<br>(0.29) | 1.99 ± 0.21<br>(0.96)  | 0.52 ± 0.03<br>(0.66) | 1.77 ± 0.17<br>(3.93)  |
| MV4-11 <sup>r</sup> Nutlin <sup>20µM</sup> V    | R248W (het)              | 16.6 ± 1.5<br>(7.12)                                                      | 6.46 ± 0.52<br>(0.45)  | 73.5 ± 10.9<br>(0.33) | 1.19 ± 0.07<br>(0.57)  | 0.23 ± 0.08<br>(0.29) | 0.62 ± 0.12<br>(1.38)  |
| MV4-11 <sup>r</sup> Nutlin <sup>20µM</sup> VI   | R248W (het)              | 16.1 ± 0.3<br>(6.91)                                                      | 4.77 ± 2.85<br>(0.33)  | 60.5 ± 7.3<br>(0.27)  | 1.03 ± 0.12<br>(0.49)  | 0.26 ± 0.04<br>(0.33) | 0.65 ± 0.05<br>(1.44)  |
| MV4-11 <sup>r</sup> Nutlin <sup>20µM</sup> VII  | R248W (het)              | 20.3 ± 2.2<br>(8.71)                                                      | 26.0 ± 4.1<br>(1.80)   | 271 ± 23<br>(1.21)    | 1.09 ± 0.10<br>(0.52)  | 0.34 ± 0.06<br>(0.43) | 0.66 ± 0.08<br>(1.47)  |
| MV4-11 <sup>r</sup> Nutlin <sup>20µM</sup> VIII | R248W (het)              | 17.0 ± 2.4<br>(7.30)                                                      | 7.05 ± 0.84<br>(0.49)  | 59.3 ± 7.8<br>(0.27)  | 1.13 ± 0.10<br>(0.54)  | 0.32 ± 0.05<br>(0.41) | 1.74 ± 0.54<br>(3.87)  |
| MV4-11 <sup>r</sup> Nutlin <sup>20µM</sup> IX   | R248W (het)              | 14.1 ± 0.7<br>(6.05)                                                      | 6.18 ± 0.96<br>(0.43)  | 88.7 ± 17.1<br>(0.40) | 1.24 ± 0.09<br>(0.60)  | 0.13 ± 0.02<br>(0.16) | 0.43 ± 0.06<br>(0.96)  |
| MV4-11 <sup>r</sup> Nutlin <sup>20µM</sup> X    | R248W (het)              | 14.2 ± 1.7<br>(6.09)                                                      | 5.33 ± 0.65<br>(0.37)  | 123 ± 24<br>(0.55)    | 0.94 ± 0.06<br>(0.45)  | 0.15 ± 0.01<br>(0.19) | 0.58 ± 0.08<br>(1.29)  |
| MV4-11 <sup>r</sup> Nutlin <sup>20µM</sup> XI   | R248W (het)              | 17.4 ± 2.0<br>(7.47)                                                      | 2.42 ± 0.27<br>(0.17)  | 46.1 ± 3.1<br>(0.21)  | 1.19 ± 0.31<br>(0.57)  | 0.15 ± 0.02<br>(0.19) | 1.44 ± 0.15<br>(3.20)  |
| MV4-11 <sup>r</sup> Nutlin <sup>20µM</sup> XII  | R248W (het)              | 13.3 ± 1.2<br>(5.71)                                                      | 2.28 ± 0.56<br>(0.16)  | 46.1 ± 9.7<br>(0.21)  | 1.54 ± 0.14<br>(0.74)  | 0.53 ± 0.06<br>(0.67) | 1.99 ± 0.25<br>(4.42)  |

|                                                      |             |                          |                           |                          |                           |                           |                           |
|------------------------------------------------------|-------------|--------------------------|---------------------------|--------------------------|---------------------------|---------------------------|---------------------------|
| MV4-11 <sup>r</sup> Nutlin <sup>20</sup> $\mu$ MXIII | R248W (het) | 15.4 $\pm$ 0.9<br>(6.61) | 6.13 $\pm$ 0.48<br>(0.42) | 151 $\pm$ 76<br>0.68     | 2.00 $\pm$ 0.25<br>(0.96) | 1.30 $\pm$ 0.25<br>(1.65) | 1.57 $\pm$ 0.09<br>(3.49) |
| MV4-11 <sup>r</sup> Nutlin <sup>20</sup> $\mu$ MXIV  | R248W (het) | 13.9 $\pm$ 1.8<br>(5.97) | 18.1 $\pm$ 3.9<br>(1.25)  | 102 $\pm$ 17<br>(0.46)   | 1.30 $\pm$ 0.20<br>(0.63) | 1.00 $\pm$ 0.18<br>(1.27) | 0.93 $\pm$ 0.20<br>(2.07) |
| MV4-11 <sup>r</sup> Nutlin <sup>20</sup> $\mu$ MXV   | R248W (het) | 17.0 $\pm$ 2.3<br>(7.30) | 3.95 $\pm$ 0.80<br>(0.27) | 51.3 $\pm$ 6.2<br>(0.23) | 1.73 $\pm$ 0.29<br>(0.83) | 0.44 $\pm$ 0.07<br>(0.56) | 1.04 $\pm$ 0.18<br>(2.31) |

| Cell line                                                | TP53 status      | Drug concentration that reduces cell viability by 50% (IC <sub>50</sub> ) <sup>1</sup> |                           |                         |                           |                           |                              |
|----------------------------------------------------------|------------------|----------------------------------------------------------------------------------------|---------------------------|-------------------------|---------------------------|---------------------------|------------------------------|
|                                                          |                  | nutlin-3<br>( $\mu$ M)                                                                 | doxorubicin<br>(ng/mL)    | etoposide<br>(ng/mL)    | gemcitabine<br>(ng/mL)    | cytarabine<br>(ng/mL)     | fludarabine<br>( $\mu$ g/mL) |
| OCI-AML-2                                                | <i>wild type</i> | 0.90 $\pm$ 0.22                                                                        | 9.80 $\pm$ 2.61           | 107 $\pm$ 24            | 2.59 $\pm$ 1.48           | 23.9 $\pm$ 13.9           | 0.22 $\pm$ 0.03              |
| OCI-AML-2 <sup>r</sup> Nutlin <sup>20</sup> $\mu$ M I    | Y220C (het)      | 19.5 $\pm$ 1.6<br>(21.7)                                                               | 27.3 $\pm$ 5.7<br>(2.79)  | 348 $\pm$ 41<br>(3.24)  | 7.40 $\pm$ 4.16<br>(2.86) | 81.5 $\pm$ 55.1<br>(3.41) | 0.36 $\pm$ 0.17<br>(1.64)    |
| OCI-AML-2 <sup>r</sup> Nutlin <sup>20</sup> $\mu$ M II   | Y220C (het)      | 19.9 $\pm$ 2.1<br>(22.1)                                                               | 27.7 $\pm$ 12.6<br>(2.83) | 273 $\pm$ 117<br>(2.54) | 1.23 $\pm$ 0.29<br>(0.47) | 17.8 $\pm$ 2.4<br>(0.74)  | 0.32 $\pm$ 0.09<br>(1.45)    |
| OCI-AML-2 <sup>r</sup> Nutlin <sup>20</sup> $\mu$ M III  | Y220C (het)      | 16.8 $\pm$ 3.4<br>(18.7)                                                               | 30.8 $\pm$ 9.5<br>(3.14)  | 342 $\pm$ 83<br>(3.18)  | 4.34 $\pm$ 2.88<br>(1.68) | 80.6 $\pm$ 44.2<br>(3.37) | 0.37 $\pm$ 0.18<br>(1.68)    |
| OCI-AML-2 <sup>r</sup> Nutlin <sup>20</sup> $\mu$ M IV   | Y220C (het)      | 17.4 $\pm$ 3.6<br>(19.3)                                                               | 28.5 $\pm$ 5.2<br>(2.91)  | 342 $\pm$ 104<br>(3.18) | 4.18 $\pm$ 2.01<br>(1.61) | 71.2 $\pm$ 40.0<br>(2.98) | 0.39 $\pm$ 0.17<br>(1.77)    |
| OCI-AML-2 <sup>r</sup> Nutlin <sup>20</sup> $\mu$ M V    | Y220C (het)      | 19.6 $\pm$ 2.9<br>(21.8)                                                               | 20.9 $\pm$ 2.9<br>(2.13)  | 216 $\pm$ 61<br>(2.01)  | 3.27 $\pm$ 1.51<br>(1.26) | 48.7 $\pm$ 18.0<br>(2.04) | 0.33 $\pm$ 0.19<br>(1.50)    |
| OCI-AML-2 <sup>r</sup> Nutlin <sup>20</sup> $\mu$ M VII  | Y220C (het)      | 17.5 $\pm$ 4.2<br>(19.4)                                                               | 19.3 $\pm$ 2.4<br>(1.97)  | 212 $\pm$ 121<br>(1.97) | 1.21 $\pm$ 0.49<br>(0.47) | 27.4 $\pm$ 7.5<br>(1.15)  | 0.36 $\pm$ 0.21<br>(1.64)    |
| OCI-AML-2 <sup>r</sup> Nutlin <sup>20</sup> $\mu$ M VIII | Y220C (het)      | 18.3 $\pm$ 3.1<br>(20.3)                                                               | 22.8 $\pm$ 10.7<br>(2.33) | 214 $\pm$ 90<br>(1.99)  | 0.96 $\pm$ 0.14<br>(0.37) | 25.8 $\pm$ 9.1<br>(1.08)  | 0.27 $\pm$ 0.10<br>(1.23)    |
| OCI-AML-2 <sup>r</sup> Nutlin <sup>20</sup> $\mu$ M X    | Y220C (het)      | 17.2 $\pm$ 4.1<br>(19.1)                                                               | 18.4 $\pm$ 6.1<br>(1.88)  | 212 $\pm$ 80<br>(1.97)  | 1.08 $\pm$ 0.20<br>(0.42) | 26.6 $\pm$ 10.5<br>(1.11) | 0.27 $\pm$ 0.06<br>(1.23)    |
| OCI-AML-2 <sup>r</sup> Nutlin <sup>20</sup> $\mu$ M XI   | Y220C (het)      | 14.8 $\pm$ 4.2<br>(16.4)                                                               | 32.7 $\pm$ 6.1<br>(3.34)  | 511 $\pm$ 47<br>(4.76)  | 1.75 $\pm$ 0.63<br>(0.68) | 46.5 $\pm$ 16.2<br>(1.95) | 0.37 $\pm$ 0.19<br>(1.68)    |



|                                                  |             |                      |                       |                     |                       |                       |                       |
|--------------------------------------------------|-------------|----------------------|-----------------------|---------------------|-----------------------|-----------------------|-----------------------|
| OCI-AML-2 <sup>r</sup> Nutlin <sup>20μM</sup> XV | Y220C (het) | 17.9 ± 3.7<br>(19.9) | 18.4 ± 3.66<br>(1.88) | 268 ± 101<br>(2.50) | 1.43 ± 0.33<br>(0.55) | 55.5 ± 18.7<br>(2.32) | 0.51 ± 0.10<br>(2.32) |
|--------------------------------------------------|-------------|----------------------|-----------------------|---------------------|-----------------------|-----------------------|-----------------------|

| Cell line                                          | TP53 status                                                   | Drug concentration that reduces cell viability by 50% (IC50) <sup>1</sup> |                        |                       |                        |                       |                        |
|----------------------------------------------------|---------------------------------------------------------------|---------------------------------------------------------------------------|------------------------|-----------------------|------------------------|-----------------------|------------------------|
|                                                    |                                                               | nutlin-3<br>(μM)                                                          | doxorubicin<br>(ng/mL) | etoposide<br>(ng/mL)  | gemcitabine<br>(ng/mL) | cytarabine<br>(ng/mL) | fludarabine<br>(μg/mL) |
| OCI-AML-3                                          | wild type                                                     | 1.75 ± 0.30                                                               | 8.90 ± 1.89            | 101 ± 12              | 0.84 ± 0.20            | 82.1 ± 3.4            | 0.71 ± 0.04            |
| OCI-AML-3 <sup>r</sup> Nutlin <sup>20μM</sup> I    | R196*4 (hom)                                                  | 20.6 ± 2.1<br>(11.7)                                                      | 14.2 ± 2.4<br>(1.60)   | 174 ± 9<br>(1.73)     | 0.98 ± 0.04<br>(1.17)  | 148 ± 66<br>(1.80)    | 1.38 ± 0.21<br>(1.94)  |
| OCI-AML-3 <sup>r</sup> Nutlin <sup>20μM</sup> IV   | R273S (het)                                                   | 19.5 ± 1.6<br>(11.1)                                                      | 11.5 ± 2.4<br>(1.29)   | 149 ± 28<br>(1.48)    | 1.38 ± 0.28<br>(1.64)  | 147 ± 10<br>(1.49)    | 1.87 ± 0.15<br>(2.63)  |
| OCI-AML-3 <sup>r</sup> Nutlin <sup>20μM</sup> V    | S215G (het)                                                   | 19.7 ± 8.7<br>(11.3)                                                      | 11.5 ± 1.0<br>(1.29)   | 121 ± 19<br>(1.20)    | 1.18 ± 0.08<br>(1.40)  | 65.3 ± 23.4<br>(0.80) | 0.84 ± 0.20<br>(1.18)  |
| OCI-AML-3 <sup>r</sup> Nutlin <sup>20μM</sup> VI   | C176F (het)                                                   | 17.2 ± 1.9<br>(9.83)                                                      | 9.65 ± 2.51<br>(1.08)  | 84.8 ± 5.8<br>(0.84)  | 1.12 ± 0.10<br>(1.33)  | 168 ± 5<br>(2.05)     | 2.23 ± 0.58<br>(3.14)  |
| OCI-AML-3 <sup>r</sup> Nutlin <sup>20μM</sup> VII  | G244S (het)                                                   | 19.7 ± 1.3<br>(11.3)                                                      | 11.3 ± 1.9<br>(1.27)   | 195 ± 4<br>(1.94)     | 0.82 ± 0.03<br>(0.98)  | 228 ± 34<br>(2.78)    | 1.94 ± 0.08<br>(2.73)  |
| OCI-AML-3 <sup>r</sup> Nutlin <sup>20μM</sup> VIII | wild-type                                                     | 19.1 ± 0.9<br>(10.9)                                                      | 9.83 ± 3.29<br>(1.10)  | 161 ± 26<br>(1.60)    | 0.78 ± 0.21<br>(0.93)  | 266 ± 83<br>(3.24)    | 1.19 ± 0.13<br>(1.68)  |
| OCI-AML-3 <sup>r</sup> Nutlin <sup>20μM</sup> IX   | c.485 del 6bp<br>(TCTACA)<br>het,<br>IYK->K<br>(p.162..p.164) | 20.0 ± 0.6<br>(11.4)                                                      | 5.19 ± 1.61<br>(0.58)  | 44.9 ± 9.6<br>(0.45)  | 0.62 ± 0.04<br>(0.74)  | 195 ± 55<br>(2.38)    | 0.73 ± 0.13<br>(1.03)  |
| OCI-AML-3 <sup>r</sup> Nutlin <sup>20μM</sup> XI   | G266V (het)                                                   | 20.6 ± 0.3<br>(11.8)                                                      | 7.63 ± 0.55<br>(0.86)  | 89.3 ± 16.3<br>(0.89) | 1.18 ± 0.40<br>(1.40)  | 97.0 ± 11.8<br>(1.18) | 2.60 ± 0.09<br>(3.66)  |
| OCI-AML-3 <sup>r</sup> Nutlin <sup>20μM</sup> XII  | wild type                                                     | 11.3 ± 1.2<br>(6.46)                                                      | 8.37 ± 1.42<br>(0.94)  | 99 ± 24<br>(0.98)     | 0.72 ± 0.24<br>(0.86)  | 77.8 ± 25.2<br>(0.95) | 0.26 ± 0.07<br>(0.37)  |
| OCI-AML-3 <sup>r</sup> Nutlin <sup>20μM</sup> XIII | wild type                                                     | 18.8 ± 1.6<br>(10.7)                                                      | 9.91 ± 0.67<br>(1.11)  | 157 ± 23<br>(1.55)    | 1.32 ± 0.14<br>(1.57)  | 434 ± 12<br>(5.29)    | 2.67 ± 0.22<br>(3.76)  |

|                                                               |             |                      |                       |                    |                       |                    |                       |
|---------------------------------------------------------------|-------------|----------------------|-----------------------|--------------------|-----------------------|--------------------|-----------------------|
| OCI-AML-3 <sup>r</sup> Nutlin <sup>20</sup> μM <sup>XIV</sup> | S215G (het) | 19.6 ± 2.8<br>(11.2) | 11.4 ± 2.9<br>(1.28)  | 181 ± 14<br>(1.80) | 1.36 ± 0.20<br>(1.62) | 248 ± 89<br>(3.02) | 1.41 ± 0.12<br>(1.99) |
| OCI-AML-3 <sup>r</sup> Nutlin <sup>20</sup> μM <sup>XV</sup>  | R248Q (het) | 17.7 ± 3.5<br>(10.1) | 9.18 ± 2.10<br>(1.03) | 146 ± 22<br>(1.45) | 1.04 ± 0.29<br>(1.24) | 134 ± 13<br>(1.63) | 2.31 ± 0.64<br>(3.25) |

630

| Cell line                                                   | TP53 status                                | Drug concentration that reduces cell viability by 50% (IC <sub>50</sub> ) <sup>1</sup> |                        |                       |                        |                       |                        |
|-------------------------------------------------------------|--------------------------------------------|----------------------------------------------------------------------------------------|------------------------|-----------------------|------------------------|-----------------------|------------------------|
|                                                             |                                            | nutlin-3<br>(μM)                                                                       | doxorubicin<br>(ng/mL) | etoposide<br>(ng/mL)  | gemcitabine<br>(ng/mL) | cytarabine<br>(ng/mL) | fludarabine<br>(μg/mL) |
| SIG-M5                                                      | wild type                                  | 1.27 ± 0.16                                                                            | 9.01 ± 1.26            | 61.9 ± 1.6            | 0.66 ± 0.02            | 150 ± 37              | 4.27 ± 0.52            |
| SIG-M5 <sup>r</sup> Nutlin <sup>20</sup> μM <sup>III</sup>  | wild type                                  | 11.2 ± 1.9<br>(8.80)                                                                   | 11 ± 1.6<br>(1.23)     | 109 ± 4<br>(1.77)     | 0.62 ± 0.04<br>(0.94)  | 36.9 ± 13.7<br>(0.25) | 1.16 ± 0.11<br>(0.27)  |
| SIG-M5 <sup>r</sup> Nutlin <sup>20</sup> μM <sup>IV</sup>   | K132E (hom)                                | 23.0 ± 3.8<br>(18.1)                                                                   | 7.12 ± 2.31<br>(0.79)  | 90.0 ± 2.3<br>(1.45)  | 1.66 ± 0.08<br>(2.52)  | 325 ± 32<br>(2.17)    | 2.20 ± 0.41<br>(0.52)  |
| SIG-M5 <sup>r</sup> Nutlin <sup>20</sup> μM <sup>VI</sup>   | R282W (het)                                | 15.2 ± 3.2<br>(11.9)                                                                   | 13.5 ± 0.85<br>(1.50)  | 86.2 ± 7.6<br>(1.39)  | 0.83 ± 0.15<br>(1.26)  | 195 ± 7<br>(1.30)     | 1.40 ± 0.34<br>(0.33)  |
| SIG-M5 <sup>r</sup> Nutlin <sup>20</sup> μM <sup>VIII</sup> | P27S (het)                                 | 11.4 ± 3.5<br>(8.98)                                                                   | 12.3 ± 0.9<br>(1.36)   | 61.6 ± 15.1<br>(1.00) | 0.69 ± 0.03<br>(1.05)  | 63.0 ± 8.5<br>(0.42)  | 3.46 ± 0.10<br>(0.81)  |
| SIG-M5 <sup>r</sup> Nutlin <sup>20</sup> μM <sup>IX</sup>   | wild type                                  | 10.1 ± 0.3<br>(7.97)                                                                   | 16.0 ± 0.7<br>(1.77)   | 200 ± 7<br>(3.23)     | 0.61 ± 0.07<br>(0.92)  | 42.5 ± 9.3<br>(0.28)  | 0.74 ± 0.07<br>(0.17)  |
| SIG-M5 <sup>r</sup> Nutlin <sup>20</sup> μM <sup>XI</sup>   | c.196 del A (->Stop in Codon), V173L (het) | 23.5 ± 0.7<br>(18.5)                                                                   | 9.07 ± 0.54<br>(1.01)  | 103 ± 7<br>(1.67)     | 0.88 ± 0.22<br>(1.33)  | 43.1 ± 6.6<br>(0.29)  | 1.47 ± 0.75<br>(0.34)  |
| SIG-M5 <sup>r</sup> Nutlin <sup>20</sup> μM <sup>XV</sup>   | wild type                                  | 3.64 ± 0.29<br>(2.87)                                                                  | 9.87 ± 0.90<br>(1.10)  | 51.5 ± 6.4<br>(0.83)  | 0.72 ± 0.01<br>(1.09)  | 73.7 ± 3.4<br>(0.49)  | 2.99 ± 0.48<br>(0.70)  |
| SIG-M5 <sup>r</sup> Nutlin <sup>20</sup> μM <sup>XX</sup>   | wild type                                  | 15.3 ± 3.8<br>(12.1)                                                                   | 7.23 ± 0.71<br>(0.80)  | 134 ± 2<br>(2.17)     | 0.57 ± 0.09<br>(0.86)  | 80.7 ± 11.1<br>(0.54) | 2.46 ± 0.13<br>(0.58)  |

631

632 <sup>1</sup> Determined by MTT after a 120h incubation period633 <sup>2</sup> het, heterozygous; hom, homozygous

634 <sup>3</sup> Fold change (IC50 nutlin-3-adapted sub-line/ IC50 respective parental cell line)

635 <sup>4</sup> Stop codon

636
